# Supplementary material for: Systematic assessment and optimizing algorithm of tumor mutational burden calculation and their implications in clinical decision-making
Source: Research Square preprint supplement (doi:10.21203/rs.3.rs-1745663/v1), 2022-06-16
Supplement: Supplementary file 1 [file bc7700247a1fccedf5a7b386.xlsx]

## Sheet: supplementary table 1
Table S1. Data for 4126 samples sequenced with different sequencing platforms and methods
Sample	Cancer type	Sequencing platforms and methods	Purity estimated by HE staining	Purity estimated by NGS	Sequencing depth	TMB (mut/Mb)
Sample1	Lung cancer	illumina_PANEL		0.38	782.197	13.6364
Sample2	Lung cancer	illumina_WES		0.4	241.474	14.9308
Sample3	Lung cancer	illumina_WES		0.25	130.643	16.8784
Sample4	Lung cancer	illumina_PANEL		1	945.724	6.49351
Sample5	Lung cancer	illumina_PANEL		1	533.594	1.94805
Sample6	Breast Cancer	illumina_PANEL		1	389.629	0
Sample7	Esophagogastric Cancer	illumina_PANEL		0.72	684.045	20.7792
Sample8	Lung cancer	illumina_PANEL		1	379.21	2.5974
Sample9	Lung cancer	illumina_PANEL		1	133.051	8.44156
Sample10	Glioma	illumina_PANEL		0.23	199.507	0
Sample11	Lung cancer	illumina_PANEL		1	296.313	6.49351
Sample12	Lung cancer	illumina_PANEL		1	588.666	0.649351
Sample13	Lung cancer	illumina_WES		1	220.828	11.2052
Sample14	Pancreatic Cancer	illumina_WES		0.62	206.966	1.80638
Sample15	Pancreatic Cancer	illumina_PANEL		1	299.383	1.94805
Sample16	Lung cancer	illumina_PANEL		1	204.307	3.24675
Sample17	Lung cancer	illumina_PANEL		1	582.044	4.54545
Sample18	Esophagogastric Cancer	illumina_PANEL		0.52	502.817	5.19481
Sample19	Lung cancer	illumina_PANEL		0.6	659.594	10.3896
Sample20	Lung cancer	illumina_WES		0.2	213.129	6.15298
Sample21	Lung cancer	illumina_PANEL		1	720.804	9.09091
Sample22	Lung cancer	illumina_WES		0.23	210.323	5.53203
Sample23	Lung cancer	illumina_PANEL		1	755.019	0.649351
Sample24	Lung cancer	illumina_PANEL		0.49	689.108	1.2987
Sample25	Lung cancer	illumina_PANEL		0.82	536.485	4.54545
Sample26	Lung cancer	illumina_PANEL		1	740.04	0.649351
Sample27	Lung cancer	illumina_PANEL		0.62	612.349	5.84416
Sample28	Lung cancer	illumina_WES		0.62	196.27	6.6328
Sample29	Renal Cell Carcinoma	illumina_PANEL		1	501.956	1.2987
Sample30	Esophagogastric Cancer	illumina_PANEL		1	554.93	1.94805
Sample31	Pancreatic Cancer	illumina_WES		0.4	195.577	1.12899
Sample32	Lung cancer	illumina_PANEL		0.45	566.246	2.5974
Sample33	Hepatobiliary Cancer	illumina_WES		0.45	267.088	2.512
Sample34	Lung cancer	illumina_PANEL		1	604.368	5.84416
Sample35	Hepatobiliary Cancer	illumina_WES		0.69	230.162	1.52413
Sample36	Lung cancer	illumina_PANEL		0.38	526	2.5974
Sample37	Hepatobiliary Cancer	illumina_PANEL		0.29	450.303	2.5974
Sample38	Esophagogastric Cancer	illumina_PANEL		0.36	625.979	1.2987
Sample39	Esophagogastric Cancer	illumina_PANEL		0.67	425.845	5.19481
Sample40	Lung cancer	illumina_WES		1	89.451	0.959639
Sample41	Lung cancer	illumina_PANEL		1	722.221	5.19481
Sample42	Lung cancer	illumina_PANEL		0.58	553.756	1.2987
Sample43	Hepatobiliary Cancer	illumina_PANEL		1	765.647	20.7792
Sample44	Esophagogastric Cancer	illumina_PANEL		1	522.113	3.8961
Sample45	Esophagogastric Cancer	illumina_WES		1	129.148	3.95145
Sample46	Esophagogastric Cancer	illumina_PANEL		0.53	654.398	4.54545
Sample47	Lung cancer	illumina_PANEL		1	1082.09	1.94805
Sample48	Melanoma	illumina_WES		1	165.928	4.5724
Sample49	Hepatobiliary Cancer	illumina_PANEL		0.48	363.533	3.8961
Sample50	Esophagogastric Cancer	illumina_PANEL		0.93	603.184	19.4805
Sample51	Breast Cancer	illumina_PANEL		0.7	690.744	5.19481
Sample52	Hepatobiliary Cancer	illumina_PANEL		0.36	468.812	5.84416
Sample53	Hepatobiliary Cancer	illumina_PANEL		0.22	746.022	11.039
Sample54	Hepatobiliary Cancer	illumina_PANEL		0.22	746.022	9.74026
Sample55	Hepatobiliary Cancer	illumina_PANEL		0.29	593.968	1.2987
Sample56	Hepatobiliary Cancer	illumina_PANEL		0.29	593.968	1.94805
Sample57	Hepatobiliary Cancer	illumina_WES		0.76	301.684	1.89105
Sample58	Breast Cancer	illumina_PANEL		0.74	991.32	2.5974
Sample59	Hepatobiliary Cancer	illumina_WES		0.81	279.232	1.89105
Sample60	Hepatobiliary Cancer	illumina_PANEL		0.74	544.905	26.6234
Sample61	Lung cancer	illumina_PANEL		0.42	549.031	12.3377
Sample62	Lung cancer	illumina_PANEL		1	840.564	0
Sample63	Lung cancer	illumina_WES		0.27	173.006	0.0282247
Sample64	Lung cancer	illumina_PANEL		1	940.229	2.5974
Sample65	Esophagogastric Cancer	illumina_PANEL		0.85	798.982	6.49351
Sample66	Esophagogastric Cancer	illumina_PANEL		0.48	859.106	6.49351
Sample67	Glioma	illumina_PANEL		0.89	711.52	3.24675
Sample68	Hepatobiliary Cancer	illumina_PANEL		0.22	810.854	5.19481
Sample69	Hepatobiliary Cancer	illumina_WES		0.45	232.844	0.705617
Sample70	Lung cancer	illumina_WES		0.64	168.697	7.45131
Sample71	Lung cancer	illumina_WES		0.36	134.486	6.99972
Sample72	Lung cancer	illumina_WES		0.31	189.186	2.76602
Sample73	Lung cancer	illumina_WES		1	242.67	2.87892
Sample74	Lung cancer	illumina_PANEL		0.53	505.231	4.54545
Sample75	Esophagogastric Cancer	illumina_PANEL		0.4	493.884	1.2987
Sample76	Esophagogastric Cancer	illumina_PANEL		0.51	624.552	3.8961
Sample77	Lung cancer	illumina_PANEL		0.7	644.298	5.84416
Sample78	Lung cancer	illumina_PANEL		0.28	790.688	4.54545
Sample79	Lung cancer	illumina_PANEL		0.32	823.022	7.14286
Sample80	Melanoma	illumina_WES		0.93	266.396	1.9475
Sample81	Lung cancer	illumina_WES		0.53	407.622	5.39091
Sample82	Esophagogastric Cancer	illumina_PANEL		0.54	681.521	1.94805
Sample83	Lung cancer	illumina_PANEL		1	756.851	0
Sample84	Lung cancer	illumina_PANEL		0.76	834.193	13.6364
Sample85	Hepatobiliary Cancer	illumina_PANEL		0.41	600.127	5.19481
Sample86	Esophagogastric Cancer	illumina_PANEL		0.28	405.035	5.19481
Sample87	Lung cancer	illumina_PANEL				11.039
Sample88	Lung cancer	illumina_WES		0.28	208.274	9.90686
Sample89	Lung cancer	illumina_PANEL		1	407.817	0.649351
Sample90	Esophagogastric Cancer	illumina_PANEL		0.3	871.82	16.8831
Sample91	Lung cancer	illumina_PANEL		0.29	869.045	2.5974
Sample92	Lung cancer	illumina_PANEL		1	893.62	0.649351
Sample93	Lung cancer	illumina_WES		1	200.351	1.10076
Sample94	Esophagogastric Cancer	illumina_PANEL		1	779.746	1.94805
Sample95	Esophagogastric Cancer	illumina_PANEL		1	732.465	0.649351
Sample96	Lung cancer	illumina_PANEL		0.31	450.209	2.5974
Sample97	Esophagogastric Cancer	illumina_PANEL		0.22	468.244	3.24675
Sample98	Lung cancer	illumina_PANEL		0.29	1295.57	11.6883
Sample99	Lung cancer	illumina_WES		0.27	172.175	0.987863
Sample100	Lung cancer	illumina_PANEL		1	674.728	1.94805
Sample101	Lung cancer	illumina_PANEL		1	369.625	21.4286
Sample102	Lung cancer	illumina_PANEL		0.26	838.163	5.19481
Sample103	Lung cancer	illumina_WES		0.23	244.169	2.25797
Sample104	Lung cancer	illumina_PANEL		0.48	898.646	6.49351
Sample105	Lung cancer	illumina_WES		0.35	238.415	3.81033
Sample106	Lung cancer	illumina_PANEL		0.22	696.133	0.649351
Sample107	Lung cancer	illumina_WES		1	197.103	0.197573
Sample108	Lung cancer	illumina_PANEL		0.43	799.471	0.649351
Sample109	Lung cancer	illumina_WES		1	187.103	0.084674
Sample110	Esophagogastric Cancer	illumina_WES		0.37	173.935	2.25797
Sample111	Lung cancer	illumina_PANEL		0.62	573.298	3.24675
Sample112	Esophagogastric Cancer	illumina_PANEL		0.44	477.639	5.19481
Sample113	Hepatobiliary Cancer	illumina_PANEL		0.34	462.508	3.24675
Sample114	Pancreatic Cancer	illumina_PANEL		1	176.902	1.2987
Sample115	Melanoma	illumina_WES		0.24	235.848	0.451595
Sample116	Melanoma	illumina_WES		0.35	220.386	3.66921
Sample117	Breast Cancer	illumina_PANEL		1	773.928	3.8961
Sample118	Renal Cell Carcinoma	illumina_PANEL		1	824.593	9.74026
Sample119	Melanoma	illumina_WES		0.83	179.826	0.620943
Sample120	Melanoma	illumina_WES		0.38	297.23	0.677392
Sample121	Lung cancer	illumina_PANEL		0.38	682.222	3.24675
Sample122	Lung cancer	illumina_PANEL		0.36	1154.83	4.54545
Sample123	Lung cancer	illumina_PANEL		0.55	914.716	1.94805
Sample124	Hepatobiliary Cancer	illumina_PANEL		0.26	871.275	3.8961
Sample125	Lung cancer	illumina_PANEL		0.63	869.994	5.19481
Sample126	Esophagogastric Cancer	illumina_PANEL		1	740.138	1.94805
Sample127	Esophagogastric Cancer	illumina_PANEL		1	694.193	2.5974
Sample128	Hepatobiliary Cancer	illumina_PANEL		0.58	654.668	2.5974
Sample129	Lung cancer	illumina_PANEL		0.52	552.969	1.94805
Sample130	Hepatobiliary Cancer	illumina_PANEL		0.2	607.595	2.5974
Sample131	Hepatobiliary Cancer	illumina_WES		0.2	201.263	1.18544
Sample132	Hepatobiliary Cancer	illumina_PANEL		0.26	571.963	4.54545
Sample133	Hepatobiliary Cancer	illumina_WES		0.31	226.801	1.18544
Sample134	Lung cancer	illumina_PANEL		0.65	992.26	5.84416
Sample135	Lung cancer	illumina_WES		0.65	250.721	2.34265
Sample136	Hepatobiliary Cancer	illumina_PANEL		0.47	681.652	4.54545
Sample137	Hepatobiliary Cancer	illumina_WES		0.45	194.568	3.64098
Sample138	Hepatobiliary Cancer	illumina_PANEL		0.41	711.046	5.84416
Sample139	Hepatobiliary Cancer	illumina_WES		1	209.607	2.48377
Sample140	Hepatobiliary Cancer	illumina_PANEL		0.26	649.934	4.54545
Sample141	Hepatobiliary Cancer	illumina_WES		0.26	257.024	1.49591
Sample142	Lung cancer	illumina_PANEL		0.39	609.539	7.14286
Sample143	Lung cancer	illumina_WES		0.23	221.138	2.14507
Sample144	Hepatobiliary Cancer	illumina_WES		0.36	145.138	3.38696
Sample145	Esophagogastric Cancer	illumina_WES		0.65	172.985	0.592718
Sample146	Hepatobiliary Cancer	illumina_WES		1	195.877	2.79424
Sample147	Lung cancer	illumina_PANEL		1	633.717	3.8961
Sample148	Lung cancer	illumina_WES		0.35	150.014	7.76178
Sample149	Esophagogastric Cancer	illumina_PANEL		0.44	287.2	8.44156
Sample150	Esophagogastric Cancer	illumina_WES		1	107.104	9.48349
Sample151	Hepatobiliary Cancer	illumina_PANEL		0.22	780.528	8.44156
Sample152	Hepatobiliary Cancer	illumina_PANEL		1	834.291	8.44156
Sample153	Hepatobiliary Cancer	illumina_WES		0.25	309.961	4.31837
Sample154	Hepatobiliary Cancer	illumina_WES		0.28	320.229	4.40305
Sample155	Hepatobiliary Cancer	illumina_PANEL		0.55	896.436	2.5974
Sample156	Lung cancer	illumina_PANEL		1	554.921	5.19481
Sample157	Esophagogastric Cancer	illumina_PANEL		1	848.124	4.54545
Sample158	Lung cancer	illumina_PANEL		0.58	629.951	6.49351
Sample159	Lung cancer	illumina_PANEL		0.93	588.376	18.8312
Sample160	Lung cancer	illumina_PANEL		0.5	738.436	12.987
Sample161	Melanoma	illumina_PANEL		0.79	557.615	1.94805
Sample162	Lung cancer	illumina_PANEL		0.87	608.64	9.09091
Sample163	Melanoma	illumina_WES		0.87	251.385	1.55236
Sample164	Lung cancer	illumina_PANEL		0.47	888.093	27.9221
Sample165	Renal Cell Carcinoma	illumina_PANEL		0.32	722.352	0.649351
Sample166	Lung cancer	illumina_PANEL		1	745.767	0
Sample167	Lung cancer	illumina_PANEL		1	876.13	3.8961
Sample168	Lung cancer	illumina_PANEL		0.31	552.681	0.649351
Sample169	Hepatobiliary Cancer	illumina_PANEL		0.44	597.827	7.79221
Sample170	Hepatobiliary Cancer	illumina_PANEL		1	830.968	5.84416
Sample171	Hepatobiliary Cancer	illumina_WES		0.36	225.37	3.69743
Sample172	Hepatobiliary Cancer	illumina_WES		1	239.983	1.86283
Sample173	Hepatobiliary Cancer	illumina_PANEL		0.57	658.748	2.5974
Sample174	Hepatobiliary Cancer	illumina_WES		0.32	214.947	1.43946
Sample175	Hepatobiliary Cancer	illumina_PANEL		0.62	711.594	1.94805
Sample176	Hepatobiliary Cancer	illumina_WES		0.63	265.364	0.677392
Sample177	Hepatobiliary Cancer	illumina_PANEL		0.23	584.808	2.5974
Sample178	Hepatobiliary Cancer	illumina_WES		1	215.012	1.15721
Sample179	Hepatobiliary Cancer	illumina_PANEL		0.45	643.846	6.49351
Sample180	Hepatobiliary Cancer	illumina_WES		0.49	218.73	5.10866
Sample181	Hepatobiliary Cancer	illumina_PANEL		0.29	571.852	5.84416
Sample182	Hepatobiliary Cancer	illumina_PANEL		0.31	632.409	5.19481
Sample183	Hepatobiliary Cancer	illumina_WES		0.23	229.186	2.59667
Sample184	Hepatobiliary Cancer	illumina_WES		0.32	203.504	3.16116
Sample185	Hepatobiliary Cancer	illumina_PANEL		0.35	542.812	0.649351
Sample186	Hepatobiliary Cancer	illumina_WES		0.34	225.582	0.451595
Sample187	Hepatobiliary Cancer	illumina_PANEL		1	690.253	9.09091
Sample188	Hepatobiliary Cancer	illumina_WES		0.41	238.496	2.34265
Sample189	Hepatobiliary Cancer	illumina_PANEL		0.62	670.919	0
Sample190	Hepatobiliary Cancer	illumina_WES		0.63	270.585	1.04431
Sample191	Hepatobiliary Cancer	illumina_PANEL		0.2	577.561	3.24675
Sample192	Hepatobiliary Cancer	illumina_WES		0.25	221.844	2.22975
Sample193	Melanoma	illumina_WES		0.71	211.217	1.66526
Sample194	Renal Cell Carcinoma	illumina_PANEL		0.61	371.765	12.987
Sample195	Lung cancer	illumina_PANEL		0.66	940.849	8.44156
Sample196	Lung cancer	illumina_PANEL		0.35	854.031	2.5974
Sample197	Lung cancer	illumina_WES		0.54	275.373	5.78606
Sample198	Lung cancer	illumina_PANEL		0.34	566.4	3.8961
Sample199	Pancreatic Cancer	illumina_PANEL		1	639.62	3.24675
Sample200	Lung cancer	illumina_PANEL		1	1151.95	3.24675
Sample201	Lung cancer	illumina_PANEL		1	682.829	1.2987
Sample202	Esophagogastric Cancer	illumina_PANEL		1	714.137	1.94805
Sample203	Lung cancer	illumina_PANEL		0.84	644.067	1.94805
Sample204	Lung cancer	illumina_PANEL		1	655.892	4.54545
Sample205	Lung cancer	illumina_PANEL		0.32	722.462	2.5974
Sample206	Lung cancer	illumina_PANEL		1	756.019	3.24675
Sample207	Pancreatic Cancer	illumina_PANEL		1	621.923	1.94805
Sample208	Lung cancer	illumina_PANEL		0.56	648.999	4.54545
Sample209	Esophagogastric Cancer	illumina_PANEL		0.52	393.518	42.8571
Sample210	Lung cancer	illumina_PANEL		0.37	670.445	5.19481
Sample211	Lung cancer	illumina_PANEL		0.31	708.513	6.49351
Sample212	Esophagogastric Cancer	illumina_WES		0.47	66.395	4.0079
Sample213	Breast Cancer	illumina_WES		1	285.445	0.479819
Sample214	Lung cancer	illumina_PANEL		0.63	471.88	0.649351
Sample215	Melanoma	illumina_WES		0.39	257.422	1.91928
Sample216	Melanoma	illumina_WES		0.49	248.195	0.931414
Sample217	Melanoma	illumina_WES		0.42	199.748	1.24189
Sample218	Pancreatic Cancer	illumina_PANEL		1	749.558	4.54545
Sample219	Lung cancer	illumina_PANEL		0.32	863.742	2.5974
Sample220	Hepatobiliary Cancer	illumina_PANEL		0.36	473.97	0.649351
Sample221	Lung cancer	illumina_WES		1	200.506	5.64493
Sample222	Lung cancer	illumina_PANEL		0.67	849.623	3.8961
Sample223	Hepatobiliary Cancer	illumina_WES		0.48	213.961	1.77815
Sample224	Hepatobiliary Cancer	illumina_WES		0.65	307.784	3.27406
Sample225	Lung cancer	illumina_WES		0.74	190.496	10.6689
Sample226	Hepatobiliary Cancer	illumina_PANEL		0.34	953.499	1.2987
Sample227	Hepatobiliary Cancer	illumina_WES		0.37	300.379	0.959639
Sample228	Hepatobiliary Cancer	illumina_WES		0.23	202.496	3.83855
Sample229	Lung cancer	illumina_PANEL		1	763.303	2.5974
Sample230	Lung cancer	illumina_PANEL		0.33	1138.9	6.49351
Sample231	Lung cancer	illumina_PANEL		0.21	773.917	3.24675
Sample232	Hepatobiliary Cancer	illumina_PANEL		1	655.269	0
Sample233	Hepatobiliary Cancer	illumina_WES		0.86	179.452	0.451595
Sample234	Esophagogastric Cancer	illumina_PANEL		1	827.366	0.649351
Sample235	Hepatobiliary Cancer	illumina_WES		0.83	228.357	2.96359
Sample236	Hepatobiliary Cancer	illumina_WES		0.9	200.065	2.3991
Sample237	Lung cancer	illumina_PANEL		0.22	719.988	6.49351
Sample238	Pancreatic Cancer	illumina_WES		0.28	217.519	2.3991
Sample239	Pancreatic Cancer	illumina_WES		0.49	244.226	2.512
Sample240	Hepatobiliary Cancer	illumina_PANEL		1	774.795	3.8961
Sample241	Hepatobiliary Cancer	illumina_WES		0.27	229.682	1.86283
Sample242	Esophagogastric Cancer	illumina_PANEL		0.28	769.739	7.14286
Sample243	Lung cancer	illumina_PANEL		1	793.785	0
Sample244	Melanoma	illumina_PANEL		0.47	831.471	1.2987
Sample245	Lung cancer	illumina_PANEL		1	843.342	2.5974
Sample246	Lung cancer	illumina_PANEL		0.55	912.074	4.54545
Sample247	Lung cancer	illumina_PANEL		1	749.92	0
Sample248	Lung cancer	illumina_WES		1	210.814	0.197573
Sample249	Lung cancer	illumina_PANEL		0.21	685.455	3.24675
Sample250	Lung cancer	illumina_PANEL		0.27	443.797	3.8961
Sample251	Lung cancer	illumina_PANEL		1	970.777	19.4805
Sample252	Hepatobiliary Cancer	illumina_PANEL		0.53	583.54	1.94805
Sample253	Lung cancer	illumina_PANEL		0.22	684.581	22.0779
Sample254	Hepatobiliary Cancer	illumina_PANEL		0.76	704.841	5.84416
Sample255	Hepatobiliary Cancer	illumina_WES		0.82	279.993	3.95145
Sample256	Lung cancer	illumina_PANEL		0.22	874.392	5.84416
Sample257	Lung cancer	illumina_PANEL		0.72	754.88	7.14286
Sample258	Esophagogastric Cancer	illumina_PANEL		0.59	755.654	50
Sample259	Lung cancer	illumina_PANEL		0.54	861.649	3.8961
Sample260	Esophagogastric Cancer	illumina_PANEL		0.47	773.523	1.94805
Sample261	Lung cancer	illumina_WES		1	280.573	0.733841
Sample262	Breast Cancer	illumina_PANEL		1	1321.51	0
Sample263	Hepatobiliary Cancer	illumina_PANEL		0.26	695.806	28.5714
Sample264	Lung cancer	illumina_WES		0.29	627.646	16.963
Sample265	Lung cancer	illumina_PANEL		0.22	1117.75	0
Sample266	Esophagogastric Cancer	illumina_WES		1	664.918	3.30229
Sample267	Pancreatic Cancer	illumina_PANEL		0.43	1195.19	3.24675
Sample268	Lung cancer	illumina_PANEL		0.3	947.305	5.84416
Sample269	Lung cancer	illumina_PANEL		0.36	586.168	0.649351
Sample270	Lung cancer	illumina_PANEL		0.31	596.184	5.19481
Sample271	Esophagogastric Cancer	illumina_PANEL		0.62	1313.77	1.2987
Sample272	Esophagogastric Cancer	illumina_PANEL		1	846.273	5.19481
Sample273	Esophagogastric Cancer	illumina_PANEL		0.45	646.588	2.5974
Sample274	Lung cancer	illumina_PANEL		0.41	875.671	6.49351
Sample275	Breast Cancer	illumina_PANEL		1	878.518	5.19481
Sample276	Lung cancer	illumina_PANEL		0.45	1330.7	3.8961
Sample277	Lung cancer	illumina_PANEL		0.23	1322.64	8.44156
Sample278	Lung cancer	illumina_PANEL		0.38	928.192	5.84416
Sample279	Lung cancer	illumina_PANEL		0.47	1062.15	2.5974
Sample280	Esophagogastric Cancer	illumina_PANEL		0.3	590.223	7.79221
Sample281	Hepatobiliary Cancer	illumina_PANEL		0.22	1078.07	1.94805
Sample282	Hepatobiliary Cancer	illumina_WES		0.32	231.242	1.66526
Sample283	Esophagogastric Cancer	illumina_PANEL		0.27	1083.66	11.039
Sample284	Lung cancer	illumina_PANEL		0.33	897.211	5.84416
Sample285	Hepatobiliary Cancer	illumina_PANEL		0.2	1000.61	1.94805
Sample286	Lung cancer	illumina_PANEL		0.29	654.163	4.54545
Sample287	Hepatobiliary Cancer	illumina_PANEL		0.26	803.025	2.5974
Sample288	Lung cancer	illumina_PANEL		0.26	1270.5	7.14286
Sample289	Esophagogastric Cancer	illumina_PANEL		0.38	569.316	12.3377
Sample290	Esophagogastric Cancer	illumina_PANEL		0.4	837.292	3.8961
Sample291	Hepatobiliary Cancer	illumina_PANEL		0.38	897.748	3.8961
Sample292	Prostate Cancer	illumina_PANEL		0.41	982.273	1.94805
Sample293	Lung cancer	illumina_PANEL		0.35	823.517	1.94805
Sample294	Lung cancer	illumina_PANEL		0.21	829.418	0
Sample295	Esophagogastric Cancer	illumina_PANEL		0.3	731.155	3.8961
Sample296	Prostate Cancer	illumina_PANEL		0.31	853.99	0.649351
Sample297	Hepatobiliary Cancer	illumina_WES		0.27	193.406	1.38301
Sample298	Esophagogastric Cancer	illumina_PANEL		0.91	883.811	2.5974
Sample299	Prostate Cancer	illumina_PANEL		0.93	799.249	3.8961
Sample300	Lung cancer	illumina_PANEL		0.44	770.454	3.8961
Sample301	Lung cancer	illumina_WES		0.3	215.208	12.2213
Sample302	Lung cancer	illumina_PANEL		0.49	899.652	7.14286
Sample303	Lung cancer	illumina_PANEL		0.28	981.821	5.19481
Sample304	Lung cancer	illumina_PANEL		0.39	845.405	1.94805
Sample305	Hepatobiliary Cancer	illumina_PANEL		0.51	824.121	4.54545
Sample306	Lung cancer	illumina_WES		0.45	258.037	8.49563
Sample307	Hepatobiliary Cancer	illumina_PANEL		0.6	850.404	6.49351
Sample308	Lung cancer	illumina_PANEL		0.28	800.339	9.74026
Sample309	Lung cancer	illumina_PANEL		0.43	778.176	3.8961
Sample310	Lung cancer	illumina_PANEL		0.24	1109.32	1.2987
Sample311	Lung cancer	illumina_PANEL		0.31	868.621	19.4805
Sample312	Esophagogastric Cancer	illumina_PANEL		0.57	825.816	7.14286
Sample313	Esophagogastric Cancer	illumina_PANEL		0.34	963.491	7.14286
Sample314	Hepatobiliary Cancer	illumina_WES		0.46	242.935	1.21366
Sample315	Lung cancer	illumina_PANEL		1	882.848	4.54545
Sample316	Hepatobiliary Cancer	illumina_WES		0.31	208.326	1.18544
Sample317	Hepatobiliary Cancer	illumina_WES		0.8	218.086	2.45555
Sample318	Hepatobiliary Cancer	illumina_WES		0.44	189.426	2.512
Sample319	Hepatobiliary Cancer	illumina_WES		0.25	231.462	2.1733
Sample320	Hepatobiliary Cancer	illumina_WES		0.26	232.984	2.512
Sample321	Hepatobiliary Cancer	illumina_WES		0.81	194.435	2.11685
Sample322	Hepatobiliary Cancer	illumina_PANEL		0.97	572.274	2.5974
Sample323	Lung cancer	illumina_PANEL		0.26	708.511	1.94805
Sample324	Lung cancer	illumina_PANEL		1	812.945	0
Sample325	Esophagogastric Cancer	illumina_WES		0.23	246.841	3.33051
Sample326	Esophagogastric Cancer	illumina_PANEL		0.4	578.28	5.84416
Sample327	Esophagogastric Cancer	illumina_WES		0.5	293.02	3.35874
Sample328	Esophagogastric Cancer	illumina_PANEL		0.71	1093.72	5.19481
Sample329	Esophagogastric Cancer	illumina_WES		0.72	280.397	4.29015
Sample330	Lung cancer	illumina_PANEL		1	729.493	1.2987
Sample331	Lung cancer	illumina_PANEL		0.28	724.365	5.19481
Sample332	Lung cancer	illumina_WES		0.45	235.901	3.44341
Sample333	Lung cancer	illumina_PANEL		0.24	985.052	3.8961
Sample334	Pancreatic Cancer	illumina_PANEL		0.22	563.391	1.2987
Sample335	Lung cancer	illumina_PANEL		0.5	680.458	3.8961
Sample336	Esophagogastric Cancer	illumina_PANEL		0.38	1052.46	5.19481
Sample337	Lung cancer	illumina_PANEL		0.22	548.785	3.24675
Sample338	Lung cancer	illumina_PANEL		0.63	678.684	59.7403
Sample339	Esophagogastric Cancer	illumina_PANEL		1	854.879	1.94805
Sample340	Breast Cancer	illumina_PANEL		0.4	586.569	3.8961
Sample341	Esophagogastric Cancer	illumina_PANEL		1	667.251	1.2987
Sample342	Breast Cancer	illumina_PANEL		0.77	487.706	7.14286
Sample343	Breast Cancer	illumina_PANEL		1	471.686	5.19481
Sample344	Bladder Cancer	illumina_WES		0.28	214.639	1.04431
Sample345	Lung cancer	illumina_PANEL		0.37	968.098	1.94805
Sample346	Lung cancer	illumina_PANEL		0.84	976.359	7.79221
Sample347	Lung cancer	illumina_PANEL		1	920.04	6.49351
Sample348	Esophagogastric Cancer	illumina_PANEL		0.43	916.332	3.24675
Sample349	Renal Cell Carcinoma	illumina_PANEL		0.42	656.733	8.44156
Sample350	Lung cancer	illumina_PANEL		1	637.577	9.74026
Sample351	Esophagogastric Cancer	illumina_PANEL		0.42	610.17	5.19481
Sample352	Esophagogastric Cancer	illumina_PANEL		0.28	1010.33	4.54545
Sample353	Esophagogastric Cancer	illumina_PANEL		0.55	845.278	1.2987
Sample354	Melanoma	illumina_PANEL		0.28	435.818	1.2987
Sample355	Melanoma	illumina_WES		0.24	188.809	1.74993
Sample356	Glioma	illumina_PANEL		0.77	830.866	3.8961
Sample357	Hepatobiliary Cancer	illumina_PANEL		0.44	811.157	3.8961
Sample358	Hepatobiliary Cancer	illumina_PANEL		0.46	786.216	2.5974
Sample359	Esophagogastric Cancer	illumina_PANEL		1	802.383	1.94805
Sample360	Hepatobiliary Cancer	illumina_PANEL		0.44	1047.4	5.84416
Sample361	Hepatobiliary Cancer	illumina_PANEL		0.74	954.061	3.8961
Sample362	Esophagogastric Cancer	illumina_PANEL		0.32	663.25	3.8961
Sample363	Lung cancer	illumina_PANEL		0.43	1086.09	7.79221
Sample364	Lung cancer	illumina_PANEL		0.33	766.616	6.49351
Sample365	Lung cancer	illumina_WES		0.39	416.115	5.89896
Sample366	Esophagogastric Cancer	illumina_PANEL		0.63	626.564	3.24675
Sample367	Lung cancer	illumina_PANEL		0.26	697.164	9.09091
Sample368	Esophagogastric Cancer	illumina_PANEL		0.41	837.535	2.5974
Sample369	Lung cancer	illumina_WES		0.36	284.353	4.06435
Sample370	Lung cancer	illumina_PANEL		0.25	616.538	0
Sample371	Lung cancer	illumina_PANEL		1	699.888	0
Sample372	Lung cancer	illumina_PANEL		0.4	599.868	10.3896
Sample373	Esophagogastric Cancer	illumina_PANEL		0.39	605.592	1.94805
Sample374	Pancreatic Cancer	illumina_PANEL		0.36	609.008	2.5974
Sample375	Lung cancer	illumina_PANEL		0.68	569.996	2.5974
Sample376	Lung cancer	illumina_PANEL		0.7	848.104	8.44156
Sample377	Lung cancer	illumina_PANEL		0.25	737.104	5.19481
Sample378	Pancreatic Cancer	illumina_PANEL		0.2	630.125	1.2987
Sample379	Lung cancer	illumina_PANEL		1	761.332	9.74026
Sample380	Renal Cell Carcinoma	illumina_PANEL		0.34	603.355	1.94805
Sample381	Hepatobiliary Cancer	illumina_PANEL		0.31	781.959	1.94805
Sample382	Hepatobiliary Cancer	illumina_PANEL		1	595.163	6.49351
Sample383	Lung cancer	illumina_PANEL		1	680.476	2.5974
Sample384	Lung cancer	illumina_PANEL		0.56	743.254	1.94805
Sample385	Lung cancer	illumina_PANEL		0.43	511.747	0
Sample386	Lung cancer	illumina_PANEL		0.33	779.613	6.49351
Sample387	Melanoma	illumina_PANEL		0.77	642.3	2.5974
Sample388	Lung cancer	illumina_PANEL		0.26	586.782	7.14286
Sample389	Lung cancer	illumina_WES		0.57	222.506	5.10866
Sample390	Lung cancer	illumina_PANEL		0.58	651.296	6.49351
Sample391	Lung cancer	illumina_WES		0.59	289.626	4.29015
Sample392	Lung cancer	illumina_PANEL		0.56	873.701	7.14286
Sample393	Esophagogastric Cancer	illumina_PANEL		0.35	684.828	7.14286
Sample394	Lung cancer	illumina_PANEL		0.3	637.932	2.5974
Sample395	Lung cancer	illumina_PANEL		0.27	660.628	2.5974
Sample396	Lung cancer	illumina_PANEL		0.23	741.072	3.8961
Sample397	Lung cancer	illumina_PANEL		0.4	785.81	9.09091
Sample398	Lung cancer	illumina_PANEL		0.34	731.805	1.94805
Sample399	Lung cancer	illumina_PANEL		0.27	820.448	4.54545
Sample400	Lung cancer	illumina_PANEL		0.24	686.678	1.94805
Sample401	Lung cancer	illumina_PANEL		0.53	465.875	10.3896
Sample402	Lung cancer	illumina_WES		0.59	180.484	9.59639
Sample403	Lung cancer	illumina_PANEL		0.43	801.554	1.2987
Sample404	Lung cancer	illumina_PANEL		0.22	494.795	5.19481
Sample405	Pancreatic Cancer	illumina_PANEL		0.3	510.727	0
Sample406	Esophagogastric Cancer	illumina_PANEL		0.41	647.448	3.8961
Sample407	Lung cancer	illumina_PANEL		0.29	483.687	1.2987
Sample408	Lung cancer	illumina_PANEL		0.23	948.037	2.5974
Sample409	Lung cancer	illumina_WES		0.23	224.165	1.80638
Sample410	Lung cancer	illumina_PANEL		0.3	748.379	28.5714
Sample411	Hepatobiliary Cancer	illumina_PANEL		0.33	515.725	7.14286
Sample412	Lung cancer	illumina_PANEL		1	971.584	0
Sample413	Lung cancer	illumina_PANEL		0.29	515.694	0.649351
Sample414	Lung cancer	illumina_PANEL		0.37	630.771	7.79221
Sample415	Hepatobiliary Cancer	illumina_PANEL		0.29	534.099	4.54545
Sample416	Pancreatic Cancer	illumina_PANEL		0.28	526.298	1.94805
Sample417	Lung cancer	illumina_PANEL		0.37	594.923	1.2987
Sample418	Lung cancer	illumina_PANEL		0.24	834.698	2.5974
Sample419	Lung cancer	illumina_PANEL		0.2	680.728	1.94805
Sample420	Lung cancer	illumina_PANEL		0.92	529.249	6.49351
Sample421	Esophagogastric Cancer	illumina_PANEL		0.52	537.732	4.54545
Sample422	Lung cancer	illumina_PANEL		0.58	570.582	9.09091
Sample423	Lung cancer	illumina_PANEL		0.27	554.317	5.19481
Sample424	Lung cancer	illumina_PANEL		1	655.03	1.2987
Sample425	Lung cancer	illumina_PANEL		0.52	1093.89	16.8831
Sample426	Lung cancer	illumina_PANEL		1	588.073	3.24675
Sample427	Lung cancer	illumina_WES		0.24	328.888	11.9673
Sample428	Lung cancer	illumina_PANEL		0.28	492.586	7.79221
Sample429	Lung cancer	illumina_WES		0.31	197.532	6.66102
Sample430	Lung cancer	illumina_PANEL		0.43	470.104	1.94805
Sample431	Esophagogastric Cancer	illumina_PANEL		0.24	430.14	1.94805
Sample432	Hepatobiliary Cancer	illumina_PANEL		0.24	774.562	3.24675
Sample433	Lung cancer	illumina_PANEL		0.23	534.721	2.5974
Sample434	Lung cancer	illumina_PANEL		0.51	871.033	24.6753
Sample435	Esophagogastric Cancer	illumina_PANEL		0.25	827.195	3.8961
Sample436	Esophagogastric Cancer	illumina_WES		0.29	304.513	1.52413
Sample437	Lung cancer	illumina_PANEL		1	534.789	1.94805
Sample438	Lung cancer	illumina_PANEL		0.22	899.614	9.09091
Sample439	Lung cancer	illumina_PANEL		0.56	801.498	3.24675
Sample440	Hepatobiliary Cancer	illumina_PANEL		0.59	975.011	1.94805
Sample441	Lung cancer	illumina_PANEL		0.26	462.878	2.5974
Sample442	Lung cancer	illumina_PANEL		0.31	591.277	14.9351
Sample443	Lung cancer	illumina_PANEL		0.49	707.488	5.84416
Sample444	Lung cancer	illumina_WES		0.51	252.566	4.99577
Sample445	Esophagogastric Cancer	illumina_PANEL		0.37	523.963	5.19481
Sample446	Esophagogastric Cancer	illumina_PANEL		0.41	541.721	5.19481
Sample447	Lung cancer	illumina_PANEL		0.29	653.592	1.94805
Sample448	Lung cancer	illumina_PANEL		0.35	574.686	5.84416
Sample449	Lung cancer	illumina_PANEL		0.38	830.739	3.24675
Sample450	Hepatobiliary Cancer	illumina_PANEL		0.32	701.809	3.8961
Sample451	Lung cancer	illumina_PANEL		0.2	677.63	2.5974
Sample452	Hepatobiliary Cancer	illumina_PANEL		0.41	686.668	2.5974
Sample453	Hepatobiliary Cancer	illumina_WES		1	215.141	10.4996
Sample454	Lung cancer	illumina_PANEL		0.88	924.877	8.44156
Sample455	Lung cancer	illumina_PANEL		0.44	620.826	5.19481
Sample456	Breast Cancer	illumina_PANEL		0.44	590.944	1.2987
Sample457	Lung cancer	illumina_PANEL		0.25	631.96	3.24675
Sample458	Lung cancer	illumina_PANEL		0.56	658.144	2.5974
Sample459	Lung cancer	illumina_PANEL		0.27	800.583	11.6883
Sample460	Lung cancer	illumina_PANEL		1	605.372	0
Sample461	Lung cancer	illumina_PANEL		0.41	1042.22	3.24675
Sample462	Pancreatic Cancer	illumina_PANEL		0.84	1048.94	5.19481
Sample463	Esophagogastric Cancer	illumina_PANEL		0.2	1061.58	1.94805
Sample464	Lung cancer	illumina_PANEL		1	565.856	5.84416
Sample465	Lung cancer	illumina_PANEL		0.21	986.944	7.14286
Sample466	Renal Cell Carcinoma	illumina_PANEL		0.48	677.811	0
Sample467	Lung cancer	illumina_PANEL		1	760.551	0.649351
Sample468	Pancreatic Cancer	illumina_PANEL		0.28	780.607	3.24675
Sample469	Lung cancer	illumina_PANEL		0.23	752.662	4.54545
Sample470	Lung cancer	illumina_PANEL		0.8	847.976	5.84416
Sample471	Lung cancer	illumina_WES		0.81	229.018	6.20943
Sample472	Lung cancer	illumina_PANEL		0.44	779.746	3.24675
Sample473	Esophagogastric Cancer	illumina_PANEL		1	726.328	2.5974
Sample474	Hepatobiliary Cancer	illumina_WES		0.37	235.365	3.95145
Sample475	Renal Cell Carcinoma	illumina_PANEL		1	892.428	30.5195
Sample476	Lung cancer	illumina_PANEL		0.22	852.441	2.5974
Sample477	Hepatobiliary Cancer	illumina_WES		0.49	267.624	2.45555
Sample478	Lung cancer	illumina_PANEL		0.47	784.527	7.14286
Sample479	Esophagogastric Cancer	illumina_PANEL		0.38	743.183	5.19481
Sample480	Pancreatic Cancer	illumina_PANEL		1	906.322	3.24675
Sample481	Lung cancer	illumina_PANEL		0.22	614.716	5.19481
Sample482	Lung cancer	illumina_PANEL		0.37	522.505	3.8961
Sample483	Esophagogastric Cancer	illumina_PANEL		0.68	407.329	12.3377
Sample484	Esophagogastric Cancer	illumina_PANEL		0.54	117.055	10.3896
Sample485	Lung cancer	illumina_PANEL		0.69	659.583	3.8961
Sample486	Lung cancer	illumina_PANEL		0.45	839.978	8.44156
Sample487	Lung cancer	illumina_PANEL		1	658.341	2.5974
Sample488	Renal Cell Carcinoma	illumina_PANEL		0.55	767.437	9.74026
Sample489	Lung cancer	illumina_PANEL		0.24	649.882	7.14286
Sample490	Pancreatic Cancer	illumina_PANEL		0.38	705.382	2.5974
Sample491	Lung cancer	illumina_PANEL		0.45	718.466	5.84416
Sample492	Lung cancer	illumina_PANEL		1	791.559	3.8961
Sample493	Esophagogastric Cancer	illumina_PANEL		1	614.362	11.039
Sample494	Lung cancer	illumina_PANEL		0.21	609.447	2.5974
Sample495	Lung cancer	illumina_PANEL		0.45	820.304	11.6883
Sample496	Lung cancer	illumina_PANEL		0.45	789.218	5.84416
Sample497	Lung cancer	illumina_PANEL		0.69	626.28	12.3377
Sample498	Lung cancer	illumina_PANEL		0.35	636.997	2.5974
Sample499	Lung cancer	illumina_PANEL		0.29	823.915	3.24675
Sample500	Lung cancer	illumina_PANEL		0.23	770.034	0.649351
Sample501	Lung cancer	illumina_PANEL		0.22	766.177	3.8961
Sample502	Hepatobiliary Cancer	illumina_PANEL		1	852.946	1.2987
Sample503	Hepatobiliary Cancer	illumina_PANEL		0.34	596.055	24.6753
Sample504	Lung cancer	illumina_PANEL		0.86	896.192	7.79221
Sample505	Melanoma	illumina_WES		0.83	443.921	0.536269
Sample506	Lung cancer	illumina_WES		0.82	328.163	13.322
Sample507	Lung cancer	illumina_PANEL		0.88	836.06	9.09091
Sample508	Hepatobiliary Cancer	illumina_WES		0.29	370.643	4.29015
Sample509	Lung cancer	illumina_PANEL		0.36	787.439	4.54545
Sample510	Lung cancer	illumina_PANEL		0.4	513.58	5.19481
Sample511	Hepatobiliary Cancer	illumina_PANEL		1	742.702	0
Sample512	Lung cancer	illumina_PANEL		0.21	883.445	0.649351
Sample513	Lung cancer	illumina_PANEL		1	766.307	0
Sample514	Esophagogastric Cancer	illumina_PANEL		0.67	964.347	6.49351
Sample515	Lung cancer	illumina_PANEL		0.89	762.088	2.5974
Sample516	Breast Cancer	illumina_PANEL		0.43	1127.36	3.8961
Sample517	Esophagogastric Cancer	illumina_PANEL		1	773.207	3.8961
Sample518	Breast Cancer	illumina_PANEL		0.46	680.127	0.649351
Sample519	Lung cancer	illumina_PANEL		0.26	1003.98	3.24675
Sample520	Lung cancer	illumina_PANEL		1	830.237	0.649351
Sample521	Esophagogastric Cancer	illumina_PANEL		0.36	718.307	4.54545
Sample522	Hepatobiliary Cancer	illumina_PANEL		0.38	888.425	6.49351
Sample523	Lung cancer	illumina_PANEL		0.43	522.099	5.19481
Sample524	Hepatobiliary Cancer	illumina_PANEL		1	816.265	3.24675
Sample525	Lung cancer	illumina_PANEL		1	795.208	7.14286
Sample526	Melanoma	illumina_PANEL		0.29	96.301	9.09091
Sample527	Esophagogastric Cancer	illumina_PANEL		0.35	1157.01	5.84416
Sample528	Lung cancer	illumina_PANEL		0.39	1005.33	5.19481
Sample529	Lung cancer	illumina_PANEL		0.84	1036.31	12.3377
Sample530	Hepatobiliary Cancer	illumina_PANEL		1	580.795	1.94805
Sample531	Lung cancer	illumina_PANEL		0.44	373.2	18.8312
Sample532	Esophagogastric Cancer	illumina_PANEL		0.28	531.436	7.79221
Sample533	Hepatobiliary Cancer	illumina_PANEL		0.23	681.821	0.649351
Sample534	Lung cancer	illumina_PANEL		0.85	679.084	3.24675
Sample535	Lung cancer	illumina_PANEL		0.54	1224.74	3.24675
Sample536	Esophagogastric Cancer	illumina_PANEL		0.23	354.841	0.649351
Sample537	Esophagogastric Cancer	illumina_PANEL		1	382.476	0
Sample538	Hepatobiliary Cancer	illumina_WES		0.29	216.411	1.58058
Sample539	Melanoma	MGI_PANEL	0.6	0.53	1535.88	1.90447
Sample540	Lung cancer	illumina_PANEL		0.53	720.525	7.79221
Sample541	Renal Cell Carcinoma	illumina_PANEL		0.2	927.443	3.24675
Sample542	Lung cancer	illumina_WES		0.9	275.179	4.29015
Sample543	Lung cancer	illumina_WES		0.76	229.013	6.97149
Sample544	Lung cancer	illumina_PANEL		0.33	1651.59	9.74026
Sample545	Esophagogastric Cancer	illumina_WES		0.95	370.001	4.20548
Sample546	Lung cancer	illumina_PANEL		0.41	545.786	5.84416
Sample547	Lung cancer	illumina_PANEL		0.46	917.433	9.74026
Sample548	Esophagogastric Cancer	illumina_WES		0.66	300.993	9.31414
Sample549	Lung cancer	illumina_PANEL		0.33	733.223	6.49351
Sample550	Lung cancer	illumina_PANEL		0.54	644.735	3.24675
Sample551	Lung cancer	illumina_PANEL		0.49	326.904	7.14286
Sample552	Lung cancer	illumina_PANEL		0.4	848.572	5.84416
Sample553	Lung cancer	illumina_PANEL		0.5	684.768	0
Sample554	Lung cancer	illumina_PANEL		0.21	1036.67	5.84416
Sample555	Esophagogastric Cancer	illumina_PANEL		1	1085.85	3.24675
Sample556	Esophagogastric Cancer	illumina_WES		0.21	360.623	1.63703
Sample557	Lung cancer	illumina_PANEL		0.99	3924.53	3.8961
Sample558	Lung cancer	illumina_PANEL		0.42	631.454	4.54545
Sample559	Lung cancer	illumina_PANEL		0.56	1001.78	14.9351
Sample560	Lung cancer	illumina_PANEL		1	1753.18	13.253
Sample561	Hepatobiliary Cancer	illumina_PANEL		0.38	880.046	0.649351
Sample562	Lung cancer	illumina_PANEL		1	679.24	6.49351
Sample563	Hepatobiliary Cancer	illumina_PANEL		0.75	1009.81	3.24675
Sample564	Hepatobiliary Cancer	illumina_PANEL		0.77	1083.53	5.19481
Sample565	Esophagogastric Cancer	illumina_PANEL		0.74	2181.45	6.49351
Sample566	Lung cancer	illumina_PANEL		0.36	1138.39	3.24675
Sample567	Pancreatic Cancer	illumina_PANEL		0.27	1468.53	3.24675
Sample568	Hepatobiliary Cancer	illumina_PANEL		0.77	746.459	5.19481
Sample569	Lung cancer	illumina_PANEL		0.88	417.134	361.688
Sample570	Lung cancer	illumina_PANEL		0.57	1049.32	2.5974
Sample571	Hepatobiliary Cancer	illumina_PANEL		0.49	941.332	9.09091
Sample572	Hepatobiliary Cancer	illumina_PANEL		0.81	1636.02	1.94805
Sample573	Esophagogastric Cancer	illumina_PANEL		0.8	880.177	5.84416
Sample574	Lung cancer	illumina_PANEL		0.72	617.53	10.3896
Sample575	Pancreatic Cancer	illumina_PANEL		1	837.827	3.8961
Sample576	Hepatobiliary Cancer	illumina_PANEL		0.39	850.935	3.8961
Sample577	Pancreatic Cancer	illumina_PANEL		0.26	908.939	0
Sample578	Hepatobiliary Cancer	illumina_PANEL		0.54	777.041	2.5974
Sample579	Hepatobiliary Cancer	illumina_PANEL		0.23	920.557	0
Sample580	Hepatobiliary Cancer	illumina_PANEL		1	608.113	9.74026
Sample581	Lung cancer	illumina_PANEL		0.89	690.232	1.2987
Sample582	Esophagogastric Cancer	illumina_WES		0.57	211.646	3.07649
Sample583	Esophagogastric Cancer	illumina_WES		0.35	286.593	2.37087
Sample584	Lung cancer	illumina_PANEL		0.49	1504.54	7.79221
Sample585	Lung cancer	illumina_PANEL		0.55	841.005	7.14286
Sample586	Esophagogastric Cancer	illumina_PANEL		0.58	656.893	1.2987
Sample587	Lung cancer	illumina_PANEL		0.47	877.909	5.84416
Sample588	Lung cancer	illumina_PANEL		0.56	453.478	22.0779
Sample589	Lung cancer	illumina_PANEL		0.21	782.085	2.5974
Sample590	Lung cancer	illumina_PANEL		0.59	714.478	3.8961
Sample591	Lung cancer	illumina_PANEL		1	786.562	10.3896
Sample592	Lung cancer	illumina_PANEL		0.36	2427.24	21.4286
Sample593	Lung cancer	illumina_PANEL		0.21	1549.47	15.5844
Sample594	Lung cancer	illumina_PANEL		0.51	1120.46	5.19481
Sample595	Lung cancer	illumina_PANEL		0.58	1020.68	5.19481
Sample596	Lung cancer	illumina_PANEL		0.39	1458.98	2.5974
Sample597	Lung cancer	illumina_PANEL	0.62		941.625	3.61446
Sample598	Hepatobiliary Cancer	illumina_PANEL		0.89	1111	1.94805
Sample599	Hepatobiliary Cancer	illumina_PANEL		1	735.277	3.8961
Sample600	Lung cancer	illumina_PANEL		0.83	1126.89	5.84416
Sample601	Lung cancer	illumina_PANEL		0.39	706.126	5.19481
Sample602	Lung cancer	illumina_PANEL		0.3	877.068	16.2338
Sample603	Lung cancer	illumina_WES		0.42	178.78	1.60881
Sample604	Melanoma	illumina_PANEL		0.75	623.499	3.24675
Sample605	Esophagogastric Cancer	illumina_PANEL		1	1137.18	96.1039
Sample606	Melanoma	illumina_WES		0.29	304.629	0.169348
Sample607	Hepatobiliary Cancer	illumina_PANEL		1	810.468	0
Sample608	Lung cancer	illumina_WES		0.26	226.143	0.649167
Sample609	Lung cancer	illumina_WES		0.34	267.906	0.0564493
Sample610	Lung cancer	illumina_PANEL		0.39	980.134	3.24675
Sample611	Lung cancer	illumina_PANEL		0.53	966.525	5.84416
Sample612	Lung cancer	illumina_PANEL		0.36	854.277	5.84416
Sample613	Lung cancer	illumina_PANEL		0.36	734.2	0
Sample614	Lung cancer	illumina_PANEL		1	886.855	1.2987
Sample615	Lung cancer	illumina_PANEL		0.66	539.268	1.2987
Sample616	Lung cancer	illumina_PANEL		0.32	536.855	6.49351
Sample617	Lung cancer	illumina_PANEL		0.74	513.904	6.49351
Sample618	Lung cancer	illumina_PANEL		0.5	593.213	7.14286
Sample619	Lung cancer	illumina_PANEL		0.21	746.803	6.49351
Sample620	Lung cancer	illumina_PANEL		0.39	776.044	1.94805
Sample621	Esophagogastric Cancer	illumina_PANEL		0.73	710.088	3.24675
Sample622	Lung cancer	illumina_PANEL		0.53	840.433	5.19481
Sample623	Esophagogastric Cancer	illumina_PANEL		0.27	713.097	1.2987
Sample624	Lung cancer	illumina_PANEL		0.25	942.431	3.24675
Sample625	Lung cancer	illumina_PANEL		0.26	861.431	4.54545
Sample626	Lung cancer	illumina_PANEL		0.35	1430.2	5.84416
Sample627	Hepatobiliary Cancer	illumina_PANEL		0.2	3081.19	5.84416
Sample628	Lung cancer	illumina_PANEL		1	879.429	0.649351
Sample629	Lung cancer	illumina_PANEL		0.31	972.537	2.5974
Sample630	Lung cancer	illumina_PANEL		1	1858.24	8.44156
Sample631	Lung cancer	illumina_PANEL		1	796.578	39.6104
Sample632	Lung cancer	illumina_PANEL		0.23	967.003	3.24675
Sample633	Lung cancer	illumina_PANEL		0.89	780.103	2.5974
Sample634	Lung cancer	illumina_PANEL		0.28	2095.38	13.253
Sample635	Lung cancer	illumina_PANEL		0.23	1042.6	2.5974
Sample636	Lung cancer	illumina_PANEL		1	780.121	3.24675
Sample637	Hepatobiliary Cancer	illumina_PANEL		0.24	1691.29	5.19481
Sample638	Esophagogastric Cancer	illumina_PANEL		0.47	1004.92	4.54545
Sample639	Lung cancer	illumina_PANEL		0.32	791.951	5.84416
Sample640	Lung cancer	illumina_PANEL		0.5	1083.93	0
Sample641	Lung cancer	illumina_PANEL		0.47	1121.72	5.84416
Sample642	Lung cancer	illumina_PANEL		1	1155.09	0
Sample643	Lung cancer	illumina_PANEL		0.31	690.69	12.987
Sample644	Lung cancer	illumina_PANEL		0.31	608.552	2.5974
Sample645	Melanoma	illumina_PANEL		0.39	2594.45	1.20482
Sample646	Lung cancer	illumina_PANEL		0.55	841.058	0.649351
Sample647	Lung cancer	illumina_PANEL		0.22	1170.68	2.5974
Sample648	Lung cancer	illumina_PANEL		0.41	725.686	1.2987
Sample649	Lung cancer	illumina_PANEL		0.34	1147.91	7.79221
Sample650	Esophagogastric Cancer	illumina_PANEL		1	797.323	9.09091
Sample651	Lung cancer	illumina_PANEL		0.21	914.106	0
Sample652	Lung cancer	illumina_PANEL		1	1301.1	7.14286
Sample653	Lung cancer	illumina_PANEL		0.23	927.877	0.649351
Sample654	Pancreatic Cancer	illumina_PANEL		0.23	547.556	0
Sample655	Pancreatic Cancer	illumina_PANEL		0.28	894.863	3.8961
Sample656	Lung cancer	illumina_PANEL		0.6	1351.4	4.54545
Sample657	Pancreatic Cancer	illumina_PANEL		0.8	1104.97	0.649351
Sample658	Lung cancer	illumina_PANEL		1	1223.28	4.54545
Sample659	Lung cancer	illumina_PANEL		0.85	1210.3	3.8961
Sample660	Lung cancer	illumina_WES		0.83	216.481	0.649167
Sample661	Lung cancer	illumina_PANEL		0.48	527.67	4.54545
Sample662	Hepatobiliary Cancer	illumina_PANEL		0.78	696.179	2.5974
Sample663	Hepatobiliary Cancer	illumina_PANEL		1	903.996	14.9351
Sample664	Esophagogastric Cancer	illumina_PANEL		0.25	1465.94	4.54545
Sample665	Lung cancer	illumina_PANEL		0.36	1086.34	1.94805
Sample666	Lung cancer	illumina_PANEL		1	873.664	3.8961
Sample667	Lung cancer	illumina_PANEL		1	1011.43	0.649351
Sample668	Lung cancer	illumina_PANEL		0.87	2288.76	1.2987
Sample669	Lung cancer	illumina_WES		0.87	241.654	2.11685
Sample670	Lung cancer	illumina_PANEL		0.4	760.902	3.8961
Sample671	Hepatobiliary Cancer	illumina_PANEL		0.44	567.708	4.54545
Sample672	Lung cancer	illumina_PANEL		0.34	1114.85	10.3896
Sample673	Lung cancer	illumina_PANEL		0.31	1157.04	10.3896
Sample674	Lung cancer	illumina_PANEL		1	752.859	1.94805
Sample675	Hepatobiliary Cancer	illumina_PANEL		0.83	689.609	3.24675
Sample676	Hepatobiliary Cancer	illumina_PANEL		0.8	746.954	3.24675
Sample677	Hepatobiliary Cancer	illumina_PANEL		1	1188.16	7.14286
Sample678	Lung cancer	illumina_PANEL		0.2	649.009	0.649351
Sample679	Hepatobiliary Cancer	illumina_PANEL		0.41	450.839	5.19481
Sample680	Hepatobiliary Cancer	illumina_PANEL		0.79	927.661	1.94805
Sample681	Hepatobiliary Cancer	illumina_PANEL		0.79	927.661	2.5974
Sample682	Hepatobiliary Cancer	illumina_PANEL		1	1234.67	0.649351
Sample683	Hepatobiliary Cancer	illumina_PANEL		0.39	1028.61	3.24675
Sample684	Lung cancer	illumina_PANEL		0.24	721.871	3.8961
Sample685	Hepatobiliary Cancer	illumina_PANEL		0.28	1462.27	4.54545
Sample686	Hepatobiliary Cancer	illumina_PANEL		0.3	705.289	0
Sample687	Lung cancer	illumina_PANEL		0.72	687.541	10.3896
Sample688	Lung cancer	illumina_PANEL		0.29	788.449	3.8961
Sample689	Hepatobiliary Cancer	illumina_WES		0.24	214.183	3.66921
Sample690	Hepatobiliary Cancer	illumina_WES		1	207.865	10.3585
Sample691	Lung cancer	illumina_PANEL		0.2	1254.3	2.5974
Sample692	Lung cancer	illumina_PANEL	0.79	0.51	748.248	20.7792
Sample693	Lung cancer	illumina_PANEL		0.68	782.372	5.19481
Sample694	Lung cancer	illumina_WES		1	531.814	3.47163
Sample695	Lung cancer	illumina_WES		0.29	303.154	0.395145
Sample696	Prostate Cancer	illumina_WES		0.75	272.704	5.30624
Sample697	Hepatobiliary Cancer	illumina_WES		0.48	202.489	8.01581
Sample698	Lung cancer	illumina_WES		0.88	290.752	12.4753
Sample699	Pancreatic Cancer	illumina_WES		0.23	249.652	1.8346
Sample700	Melanoma	illumina_WES		0.45	451.713	1.04431
Sample701	Lung cancer	illumina_WES		0.2	259.43	12.7858
Sample702	Hepatobiliary Cancer	illumina_WES		0.34	335.879	1.10076
Sample703	Melanoma	illumina_WES		0.82	320.566	5.02399
Sample704	Lung cancer	illumina_WES		0.97	320.374	23.2854
Sample705	Lung cancer	illumina_WES		1	99.457	43.1555
Sample706	Lung cancer	illumina_PANEL		0.66	791.159	4.54545
Sample707	Prostate Cancer	illumina_PANEL		0.34	507.507	3.8961
Sample708	Renal Cell Carcinoma	illumina_PANEL		0.45	851.401	2.5974
Sample709	Esophagogastric Cancer	illumina_PANEL		0.46	784.801	2.5974
Sample710	Esophagogastric Cancer	illumina_PANEL		0.93	1071.09	4.54545
Sample711	Esophagogastric Cancer	illumina_PANEL		0.29	786.097	5.19481
Sample712	Esophagogastric Cancer	illumina_PANEL		0.92	998.879	11.039
Sample713	Lung cancer	illumina_PANEL		0.39	1218.04	4.54545
Sample714	Hepatobiliary Cancer	illumina_PANEL		0.6	1606.47	3.8961
Sample715	Hepatobiliary Cancer	illumina_PANEL		1	1443.15	2.5974
Sample716	Hepatobiliary Cancer	illumina_PANEL		0.41	1748.26	6.49351
Sample717	Lung cancer	illumina_PANEL		0.24	1189.82	4.54545
Sample718	Lung cancer	illumina_PANEL		1	977.51	1.94805
Sample719	Lung cancer	illumina_PANEL		1	1100.39	1.94805
Sample720	Lung cancer	illumina_PANEL		0.27	1033.57	2.5974
Sample721	Lung cancer	illumina_PANEL		0.26	888.126	3.24675
Sample722	Lung cancer	illumina_PANEL		0.51	631.336	7.14286
Sample723	Lung cancer	illumina_PANEL		1	1492.29	3.8961
Sample724	Esophagogastric Cancer	illumina_PANEL		1	808.411	0
Sample725	Lung cancer	illumina_PANEL		0.82	722.012	5.84416
Sample726	Lung cancer	illumina_PANEL		0.62	656.823	1.2987
Sample727	Lung cancer	illumina_PANEL		0.49	759.103	3.24675
Sample728	Lung cancer	illumina_PANEL		0.35	937.203	5.19481
Sample729	Melanoma	illumina_PANEL		0.39	834.854	1.94805
Sample730	Lung cancer	illumina_PANEL		1	2709.39	1.94805
Sample731	Lung cancer	illumina_PANEL		0.2	1524.44	4.54545
Sample732	Esophagogastric Cancer	illumina_PANEL		0.59	1000.28	2.5974
Sample733	Lung cancer	illumina_PANEL		0.43	959.264	2.5974
Sample734	Breast Cancer	illumina_PANEL		0.84	1144.49	3.24675
Sample735	Esophagogastric Cancer	illumina_PANEL		0.5	608.819	6.49351
Sample736	Breast Cancer	illumina_PANEL		0.9	558.623	22.0779
Sample737	Lung cancer	illumina_PANEL		0.21	865.139	10.3896
Sample738	Lung cancer	illumina_PANEL		0.46	1132.81	1.94805
Sample739	Lung cancer	illumina_PANEL		0.29	1100.47	11.039
Sample740	Lung cancer	illumina_PANEL		0.92	1001.24	5.19481
Sample741	Lung cancer	illumina_PANEL		1	1093.36	9.09091
Sample742	Lung cancer	illumina_PANEL	0.78	0.26	1133.09	4.54545
Sample743	Lung cancer	illumina_PANEL		0.58	914.839	2.5974
Sample744	Esophagogastric Cancer	illumina_PANEL		1	1127.97	8.44156
Sample745	Lung cancer	illumina_PANEL		0.22	690.348	2.5974
Sample746	Lung cancer	illumina_WES		0.26	278.202	1.86283
Sample747	Lung cancer	illumina_PANEL		0.67	599.101	9.74026
Sample748	Lung cancer	illumina_PANEL		0.56	1015.52	6.49351
Sample749	Lung cancer	illumina_PANEL		0.34	876.94	2.5974
Sample750	Lung cancer	illumina_PANEL			1477.39	7.22892
Sample751	Esophagogastric Cancer	illumina_PANEL		0.67	1596.99	9.74026
Sample752	Esophagogastric Cancer	illumina_PANEL		0.46	1459.49	12.3377
Sample753	Melanoma	illumina_PANEL		0.28	817.457	5.19481
Sample754	Renal Cell Carcinoma	illumina_PANEL		0.9	3310.39	6.49351
Sample755	Renal Cell Carcinoma	illumina_PANEL		0.22	625.44	3.8961
Sample756	Renal Cell Carcinoma	illumina_PANEL		0.21	887.976	1.94805
Sample757	Melanoma	illumina_PANEL		0.75	1314.75	1.2987
Sample758	Breast Cancer	illumina_PANEL		0.33	994.228	1.94805
Sample759	Lung cancer	illumina_PANEL		0.49	1245.17	7.79221
Sample760	Esophagogastric Cancer	illumina_PANEL		0.37	862.218	90.2597
Sample761	Renal Cell Carcinoma	illumina_PANEL		0.24	1383.55	87.013
Sample762	Melanoma	illumina_PANEL		0.21	543.897	25.974
Sample763	Hepatobiliary Cancer	illumina_PANEL		0.77	915.344	1.2987
Sample764	Hepatobiliary Cancer	illumina_PANEL		0.6	1116.8	9.74026
Sample765	Lung cancer	illumina_PANEL		0.25	1025.9	2.5974
Sample766	Lung cancer	illumina_PANEL		0.84	898.933	7.79221
Sample767	Esophagogastric Cancer	illumina_PANEL		0.42	914.922	0
Sample768	Renal Cell Carcinoma	illumina_PANEL		0.69	1153.94	1.94805
Sample769	Esophagogastric Cancer	illumina_PANEL		0.43	1265.14	5.84416
Sample770	Lung cancer	illumina_PANEL		0.3	1198.57	4.54545
Sample771	Lung cancer	illumina_PANEL		0.4	1019.22	3.24675
Sample772	Esophagogastric Cancer	illumina_PANEL		0.23	772.492	1.94805
Sample773	Pancreatic Cancer	illumina_PANEL		0.27	1050.33	11.039
Sample774	Lung cancer	illumina_PANEL		0.86	810.621	9.09091
Sample775	Lung cancer	illumina_PANEL		0.21	948.119	13.6364
Sample776	Esophagogastric Cancer	illumina_PANEL		1	1357.21	5.19481
Sample777	Lung cancer	illumina_PANEL		1	1384.25	3.24675
Sample778	Renal Cell Carcinoma	illumina_PANEL		0.29	714.292	4.54545
Sample779	Renal Cell Carcinoma	illumina_PANEL		1	635.339	4.54545
Sample780	Esophagogastric Cancer	illumina_PANEL		0.3	730.38	8.44156
Sample781	Lung cancer	illumina_PANEL		0.28	869.022	8.44156
Sample782	Lung cancer	illumina_PANEL		0.47	1468.99	5.84416
Sample783	Lung cancer	illumina_PANEL		0.33	1614.15	3.24675
Sample784	Lung cancer	illumina_PANEL		0.23	952.73	3.8961
Sample785	Renal Cell Carcinoma	illumina_PANEL		0.39	574.87	62.987
Sample786	Lung cancer	illumina_PANEL		0.27	898.443	8.44156
Sample787	Hepatobiliary Cancer	illumina_PANEL		0.78	1206.41	14.2857
Sample788	Hepatobiliary Cancer	illumina_PANEL		0.36	829.844	1.94805
Sample789	Hepatobiliary Cancer	illumina_PANEL		0.61	984.624	9.09091
Sample790	Hepatobiliary Cancer	illumina_PANEL		0.2	1012.87	2.5974
Sample791	Breast Cancer	illumina_PANEL		1	1852.39	7.79221
Sample792	Hepatobiliary Cancer	illumina_PANEL		0.58	1528.68	0.649351
Sample793	Hepatobiliary Cancer	illumina_PANEL		0.21	1291.33	14.2857
Sample794	Esophagogastric Cancer	illumina_PANEL		0.6	976.9	6.49351
Sample795	Hepatobiliary Cancer	illumina_PANEL		0.74	521.803	1.2987
Sample796	Hepatobiliary Cancer	illumina_PANEL		1	315.283	7.79221
Sample797	Lung cancer	illumina_PANEL		0.56	960.753	2.5974
Sample798	Lung cancer	illumina_PANEL		0.44	713.676	18.1818
Sample799	Esophagogastric Cancer	illumina_PANEL		0.47	1102.45	9.09091
Sample800	Breast Cancer	illumina_PANEL		0.29	1047.42	13.6364
Sample801	Breast Cancer	illumina_PANEL		1	769.57	3.8961
Sample802	Lung cancer	illumina_PANEL		0.54	702.792	5.84416
Sample803	Lung cancer	illumina_WES		0.4	264.01	3.41518
Sample804	Lung cancer	illumina_PANEL	0.17	1	654.022	4.54545
Sample805	Glioma	illumina_PANEL		0.78	582.5	1.94805
Sample806	Lung cancer	illumina_PANEL		0.31	532.757	5.84416
Sample807	Pancreatic Cancer	illumina_PANEL		0.32	851.392	1.94805
Sample808	Hepatobiliary Cancer	illumina_PANEL		0.32	526.136	3.8961
Sample809	Renal Cell Carcinoma	illumina_PANEL	0.82	1	933.825	20.1299
Sample810	Pancreatic Cancer	illumina_PANEL	0.38	1	1012.47	1.2987
Sample811	Lung cancer	illumina_PANEL		0.84	890.261	8.44156
Sample812	Esophagogastric Cancer	illumina_PANEL	0.69	0.79	595.508	3.8961
Sample813	Lung cancer	illumina_PANEL	0.41	1	792.255	2.5974
Sample814	Hepatobiliary Cancer	illumina_WES		0.85	676.767	2.25797
Sample815	Lung cancer	illumina_PANEL		0.44	1180.81	3.24675
Sample816	Lung cancer	illumina_PANEL	0.07	0.5	1678.15	11.039
Sample817	Lung cancer	illumina_PANEL		0.22	1820.81	3.24675
Sample818	Lung cancer	illumina_PANEL		0.99	1372.08	61.4458
Sample819	Breast Cancer	illumina_PANEL	0.85	1	1288.16	3.24675
Sample820	Lung cancer	illumina_PANEL		0.26	691.013	1.94805
Sample821	Lung cancer	illumina_PANEL		1	975.594	2.5974
Sample822	Lung cancer	illumina_PANEL		0.85	1615.58	6.49351
Sample823	Esophagogastric Cancer	illumina_PANEL		0.43	1124.13	3.24675
Sample824	Lung cancer	illumina_PANEL		0.42	968.171	3.24675
Sample825	Lung cancer	illumina_PANEL		1	967.493	6.49351
Sample826	Lung cancer	illumina_PANEL		1	1042.83	6.49351
Sample827	Lung cancer	illumina_PANEL	0.42	1	1929.89	5.84416
Sample828	Lung cancer	illumina_PANEL		0.99	1136.89	7.79221
Sample829	Lung cancer	illumina_PANEL		0.43	743.926	1.94805
Sample830	Hepatobiliary Cancer	illumina_PANEL		0.35	854.914	2.5974
Sample831	Lung cancer	illumina_PANEL		0.4	1341.39	2.5974
Sample832	Lung cancer	illumina_PANEL		0.4	1291.72	1.2987
Sample833	Lung cancer	illumina_PANEL		0.37	824.347	7.14286
Sample834	Lung cancer	illumina_PANEL		0.45	826.743	7.79221
Sample835	Hepatobiliary Cancer	illumina_WES		0.6	297.608	7.70533
Sample836	Lung cancer	illumina_PANEL		0.56	1953.52	10.3896
Sample837	Lung cancer	illumina_PANEL		0.32	1303.97	3.24675
Sample838	Hepatobiliary Cancer	illumina_PANEL		0.46	1261.26	1.94805
Sample839	Lung cancer	illumina_PANEL		0.36	1483.17	2.5974
Sample840	Lung cancer	illumina_PANEL		0.31	1256.43	2.5974
Sample841	Lung cancer	illumina_PANEL		0.43	2776.56	2.40964
Sample842	Esophagogastric Cancer	illumina_PANEL		0.41	1831.47	8.43373
Sample843	Esophagogastric Cancer	illumina_PANEL		0.43	894.67	4.54545
Sample844	Lung cancer	illumina_PANEL	0.1	0.5	1013.48	2.5974
Sample845	Melanoma	illumina_PANEL		0.45	805.837	3.24675
Sample846	Lung cancer	illumina_PANEL			2006.89	14.4578
Sample847	Esophagogastric Cancer	illumina_PANEL		0.25	1251.49	2.5974
Sample848	Hepatobiliary Cancer	illumina_PANEL		1	1160.98	2.5974
Sample849	Lung cancer	illumina_PANEL	0.24	1	843.137	22.0779
Sample850	Lung cancer	illumina_PANEL		0.37	978.271	9.09091
Sample851	Lung cancer	illumina_PANEL		0.4	589.746	79.8701
Sample852	Esophagogastric Cancer	illumina_WES		1	383.642	2.59667
Sample853	Lung cancer	illumina_WES		0.28	384.76	3.27406
Sample854	Lung cancer	illumina_WES		0.48	291.98	0.169348
Sample855	Lung cancer	illumina_WES		1	211.64	47.0787
Sample856	Esophagogastric Cancer	illumina_WES		0.27	300.566	4.2337
Sample857	Lung cancer	illumina_WES		1	380.775	3.44341
Sample858	Hepatobiliary Cancer	illumina_PANEL		0.81	925.011	5.84416
Sample859	Hepatobiliary Cancer	illumina_PANEL		1	1604.21	7.14286
Sample860	Hepatobiliary Cancer	illumina_PANEL		0.52	527.709	8.44156
Sample861	Hepatobiliary Cancer	illumina_PANEL		0.65	737.217	8.44156
Sample862	Hepatobiliary Cancer	illumina_PANEL		0.25	1092.17	3.8961
Sample863	Lung cancer	illumina_PANEL		0.29	1804.43	1.2987
Sample864	Esophagogastric Cancer	illumina_PANEL		0.23	1088.11	7.79221
Sample865	Lung cancer	illumina_PANEL		0.23	672.563	7.79221
Sample866	Esophagogastric Cancer	illumina_PANEL		0.46	1003.12	5.19481
Sample867	Hepatobiliary Cancer	illumina_PANEL		1	996.915	0
Sample868	Lung cancer	illumina_PANEL		0.26	1631.63	2.40964
Sample869	Esophagogastric Cancer	illumina_PANEL		1	681.022	3.8961
Sample870	Esophagogastric Cancer	illumina_PANEL		1	748.123	0
Sample871	Lung cancer	illumina_PANEL		0.54	845.113	1.2987
Sample872	Lung cancer	illumina_PANEL		0.6	803.614	7.79221
Sample873	Hepatobiliary Cancer	illumina_PANEL		0.46	746.386	2.5974
Sample874	Hepatobiliary Cancer	illumina_WES		0.92	282.138	1.21366
Sample875	Hepatobiliary Cancer	illumina_PANEL		0.43	530.903	5.19481
Sample876	Lung cancer	illumina_PANEL		0.28	991.11	4.54545
Sample877	Esophagogastric Cancer	illumina_PANEL		0.28	1150.62	4.54545
Sample878	Prostate Cancer	illumina_PANEL		0.72	579.969	3.24675
Sample879	Lung cancer	illumina_PANEL		0.38	1018.33	3.24675
Sample880	Lung cancer	illumina_PANEL		0.32	757.392	3.24675
Sample881	Lung cancer	illumina_PANEL		1	996.471	9.09091
Sample882	Esophagogastric Cancer	illumina_PANEL		0.28	807.469	6.49351
Sample883	Lung cancer	illumina_PANEL		0.92	1089.65	36.3636
Sample884	Lung cancer	illumina_PANEL		0.73	2347.58	3.24675
Sample885	Lung cancer	illumina_PANEL		0.64	617.271	4.54545
Sample886	Lung cancer	illumina_PANEL		0.35	2029.15	1.94805
Sample887	Lung cancer	illumina_PANEL		1	2179.3	5.19481
Sample888	Lung cancer	illumina_PANEL		0.67	773.233	3.24675
Sample889	Renal Cell Carcinoma	illumina_PANEL		0.25	1345.04	14.9351
Sample890	Lung cancer	illumina_PANEL		0.37	1034.92	3.24675
Sample891	Lung cancer	illumina_PANEL		0.62	531.955	11.039
Sample892	Lung cancer	illumina_PANEL		0.47	829.796	3.8961
Sample893	Lung cancer	illumina_PANEL		0.21	705.402	0
Sample894	Lung cancer	illumina_PANEL		0.34	451.932	1.94805
Sample895	Lung cancer	illumina_PANEL		0.69	753.106	5.19481
Sample896	Hepatobiliary Cancer	illumina_PANEL		0.76	1854.49	5.19481
Sample897	Lung cancer	illumina_PANEL		0.2	605.5	5.19481
Sample898	Lung cancer	illumina_PANEL		0.46	1053.25	5.19481
Sample899	Lung cancer	illumina_PANEL		0.76	509.003	2.5974
Sample900	Lung cancer	illumina_PANEL		0.22	1165.98	9.09091
Sample901	Esophagogastric Cancer	illumina_PANEL		0.3	815.747	5.19481
Sample902	Lung cancer	illumina_PANEL		1	1518.06	4.54545
Sample903	Hepatobiliary Cancer	illumina_PANEL		0.35	785.498	0
Sample904	Lung cancer	illumina_PANEL		0.52	465.799	3.8961
Sample905	Esophagogastric Cancer	illumina_PANEL		0.6	565.35	2.5974
Sample906	Lung cancer	illumina_PANEL	0.9	0.31	647.042	1.94805
Sample907	Lung cancer	illumina_PANEL	0.91	0.52	663.565	3.24675
Sample908	Lung cancer	illumina_PANEL		0.39	3096.29	5.19481
Sample909	Lung cancer	illumina_PANEL		0.23	991.983	11.039
Sample910	Lung cancer	illumina_PANEL		0.22	436.989	1.94805
Sample911	Lung cancer	illumina_PANEL		0.3	497.832	7.79221
Sample912	Lung cancer	illumina_PANEL		0.27	1010.72	3.8961
Sample913	Hepatobiliary Cancer	illumina_PANEL		0.7	729.801	4.54545
Sample914	Lung cancer	illumina_PANEL		0.3	853.547	5.84416
Sample915	Breast Cancer	illumina_PANEL		1	570.472	2.5974
Sample916	Lung cancer	illumina_PANEL		0.27	674.446	7.79221
Sample917	Lung cancer	illumina_PANEL	0.7	0.51	1196.39	7.79221
Sample918	Esophagogastric Cancer	illumina_PANEL		0.75	969.978	7.14286
Sample919	Esophagogastric Cancer	illumina_PANEL		0.34	1013.91	5.84416
Sample920	Esophagogastric Cancer	illumina_PANEL		0.28	959.883	5.19481
Sample921	Prostate Cancer	illumina_PANEL		0.4	2780.17	49.3506
Sample922	Lung cancer	illumina_WES		1	346.036	0.282247
Sample923	Lung cancer	illumina_WES		0.56	268.217	5.95541
Sample924	Lung cancer	illumina_WES		0.67	228.319	9.51171
Sample925	Lung cancer	illumina_PANEL		0.2	745.085	0.649351
Sample926	Lung cancer	illumina_PANEL		1	953.266	7.79221
Sample927	Esophagogastric Cancer	illumina_PANEL		0.51	1440.2	5.19481
Sample928	Lung cancer	illumina_PANEL		1	542.952	5.84416
Sample929	Lung cancer	illumina_PANEL		0.54	985.808	1.94805
Sample930	Lung cancer	illumina_PANEL		0.2	960.05	4.54545
Sample931	Lung cancer	illumina_WES		0.27	261.323	4.79819
Sample932	Lung cancer	illumina_WES		0.22	200.556	1.69348
Sample933	Lung cancer	illumina_WES		0.26	298.509	0.592718
Sample934	Lung cancer	illumina_WES		0.23	380.906	5.78606
Sample935	Lung cancer	illumina_PANEL		0.27	2396.72	4.81928
Sample936	Melanoma	illumina_PANEL		0.98	835.174	2.5974
Sample937	Lung cancer	illumina_WES		0.62	382.698	7.22552
Sample938	Lung cancer	illumina_WES		0.42	161.347	65.2554
Sample939	Lung cancer	illumina_WES		0.28	217.944	98.0525
Sample940	Esophagogastric Cancer	illumina_PANEL		0.28	874.753	5.84416
Sample941	Lung cancer	illumina_PANEL		0.2	989.904	0.649351
Sample942	Esophagogastric Cancer	illumina_PANEL		0.56	1376.09	20.7792
Sample943	Esophagogastric Cancer	illumina_PANEL		1	736.651	5.19481
Sample944	Lung cancer	illumina_PANEL		0.43	795.907	14.2857
Sample945	Lung cancer	illumina_PANEL		0.51	1204.83	10.3896
Sample946	Esophagogastric Cancer	illumina_PANEL		0.36	756.747	6.49351
Sample947	Lung cancer	illumina_PANEL		0.27	3592.47	0
Sample948	Hepatobiliary Cancer	illumina_PANEL		0.5	465.042	5.84416
Sample949	Hepatobiliary Cancer	illumina_PANEL		1	554.992	0.649351
Sample950	Esophagogastric Cancer	illumina_PANEL		1	1789.14	4.81928
Sample951	Lung cancer	illumina_PANEL		1	4648.97	1.20482
Sample952	Lung cancer	illumina_PANEL			2684.9	2.40964
Sample953	Lung cancer	illumina_PANEL			1452.51	8.43373
Sample954	Lung cancer	illumina_PANEL			1993.8	0
Sample955	Lung cancer	illumina_PANEL		0.74	1124.88	5.84416
Sample956	Lung cancer	illumina_PANEL		1	1035.57	1.94805
Sample957	Lung cancer	illumina_PANEL			1979.09	2.40964
Sample958	Lung cancer	illumina_PANEL	0.43	1	3500.69	3.61446
Sample959	Lung cancer	illumina_PANEL		0.58	2413.51	4.81928
Sample960	Lung cancer	illumina_PANEL			2261.74	2.40964
Sample961	Lung cancer	illumina_PANEL	0.34	1	913.042	1.94805
Sample962	Lung cancer	illumina_PANEL			2215.99	4.81928
Sample963	Lung cancer	illumina_PANEL			1946.24	2.40964
Sample964	Lung cancer	illumina_PANEL			1808.61	0
Sample965	Lung cancer	illumina_PANEL	0.9		1802.9	2.40964
Sample966	Lung cancer	illumina_PANEL		0.22	2360.98	7.22892
Sample967	Lung cancer	illumina_PANEL	0.65		2176.36	4.81928
Sample968	Lung cancer	illumina_PANEL	0.96		2279.53	1.20482
Sample969	Lung cancer	illumina_PANEL	0.63		2511.64	2.40964
Sample970	Lung cancer	illumina_PANEL	0.74		2381.43	1.20482
Sample971	Lung cancer	illumina_PANEL		1	1106.95	12.3377
Sample972	Lung cancer	illumina_PANEL	0.45	1	1224.97	14.4578
Sample973	Renal Cell Carcinoma	illumina_PANEL		0.38	1380.76	2.40964
Sample974	Lung cancer	illumina_PANEL	0.19		2442.76	0
Sample975	Lung cancer	illumina_PANEL		0.4	847.944	2.5974
Sample976	Lung cancer	illumina_PANEL			1695.05	6.0241
Sample977	Lung cancer	illumina_PANEL			1810.14	6.0241
Sample978	Lung cancer	illumina_PANEL	0.05		2565.84	0
Sample979	Lung cancer	illumina_PANEL		0.28	1154.36	61.4458
Sample980	Lung cancer	illumina_PANEL		0.47	1486.58	9.63855
Sample981	Lung cancer	illumina_PANEL		0.23	1923.12	1.20482
Sample982	Lung cancer	illumina_PANEL			2359.61	1.20482
Sample983	Lung cancer	illumina_PANEL		0.21	720.04	5.84416
Sample984	Lung cancer	illumina_PANEL		1	674.962	7.14286
Sample985	Lung cancer	illumina_PANEL	0.72	0.38	896.481	9.74026
Sample986	Lung cancer	illumina_PANEL		1	2246.65	0
Sample987	Lung cancer	illumina_PANEL		0.52	2464.66	0
Sample988	Lung cancer	illumina_PANEL	0.17	0.22	878.176	1.2987
Sample989	Lung cancer	illumina_PANEL	0.94	0.55	1508.33	13.6364
Sample990	Lung cancer	illumina_PANEL	0.59	0.34	996.772	11.6883
Sample991	Lung cancer	illumina_PANEL	0.86	0.24	1777.19	18.0723
Sample992	Lung cancer	illumina_PANEL		0.7	3258.89	6.0241
Sample993	Lung cancer	illumina_PANEL	0.44	1	777.238	0.649351
Sample994	Lung cancer	illumina_WES	0.37	1	473.104	18.0073
Sample995	Lung cancer	illumina_WES	0.47	0.27	311.463	2.85069
Sample996	Lung cancer	illumina_WES	0.56	0.27	325.968	2.87892
Sample997	Lung cancer	illumina_WES		0.7	311.296	0.225797
Sample998	Lung cancer	illumina_WES		0.25	281.175	0.338696
Sample999	Lung cancer	illumina_WES	0.2	0.35	302.589	0.479819
Sample1000	Lung cancer	illumina_WES		0.26	246.863	0.649167
Sample1001	Lung cancer	illumina_PANEL		0.22	1265.07	4.54545
Sample1002	Renal Cell Carcinoma	illumina_PANEL		0.45	590.511	20.1299
Sample1003	Esophagogastric Cancer	illumina_PANEL		0.4	3076.94	14.4578
Sample1004	Lung cancer	illumina_PANEL		1	1048.33	0
Sample1005	Lung cancer	illumina_PANEL		0.51	2021.26	8.43373
Sample1006	Lung cancer	illumina_PANEL		0.44	2282.08	4.81928
Sample1007	Lung cancer	illumina_PANEL		0.45	1388.19	12.0482
Sample1008	Lung cancer	illumina_PANEL		0.66	2185.83	18.0723
Sample1009	Lung cancer	illumina_PANEL		1	2725.39	0
Sample1010	Esophagogastric Cancer	illumina_PANEL		1	2204.27	3.61446
Sample1011	Lung cancer	illumina_PANEL		0.52	2121.46	8.43373
Sample1012	Lung cancer	illumina_PANEL		1	3128.26	4.81928
Sample1013	Lung cancer	illumina_PANEL		1	2705.74	0
Sample1014	Lung cancer	illumina_PANEL		0.31	3392.17	7.22892
Sample1015	Lung cancer	illumina_PANEL		0.34	969.274	1.2987
Sample1016	Lung cancer	illumina_PANEL		1	887.64	2.5974
Sample1017	Lung cancer	illumina_PANEL		0.65	586.274	4.54545
Sample1018	Lung cancer	illumina_PANEL		0.49	607.218	2.5974
Sample1019	Lung cancer	illumina_PANEL		0.24	626.244	2.5974
Sample1020	Lung cancer	illumina_PANEL		0.2	805.046	4.54545
Sample1021	Lung cancer	illumina_PANEL		0.37	1285.54	3.24675
Sample1022	Lung cancer	illumina_PANEL		0.33	643.578	0.649351
Sample1023	Lung cancer	illumina_PANEL		0.23	1037.29	2.5974
Sample1024	Lung cancer	illumina_PANEL		0.24	928.738	0.649351
Sample1025	Lung cancer	illumina_PANEL		0.3	675.745	5.84416
Sample1026	Lung cancer	illumina_PANEL		0.38	913.519	1.94805
Sample1027	Lung cancer	illumina_PANEL		0.24	724.632	1.2987
Sample1028	Renal Cell Carcinoma	illumina_PANEL		0.37	800.553	5.19481
Sample1029	Lung cancer	illumina_PANEL		1	1047.35	7.14286
Sample1030	Lung cancer	illumina_PANEL		0.35	831.373	3.24675
Sample1031	Lung cancer	illumina_PANEL		0.3	769.005	0.649351
Sample1032	Esophagogastric Cancer	illumina_PANEL		0.41	1380.96	4.54545
Sample1033	Lung cancer	illumina_PANEL		0.33	4015.99	4.54545
Sample1034	Lung cancer	illumina_PANEL	0.28	0.4	666.585	3.8961
Sample1035	Pancreatic Cancer	illumina_PANEL		1	656.86	1.94805
Sample1036	Pancreatic Cancer	illumina_PANEL		0.23	1498.29	1.2987
Sample1037	Hepatobiliary Cancer	illumina_PANEL		0.8	898.661	1.94805
Sample1038	Melanoma	illumina_PANEL		0.87	882.943	7.14286
Sample1039	Lung cancer	illumina_PANEL		0.73	1497.11	6.49351
Sample1040	Esophagogastric Cancer	illumina_PANEL		0.76	827.854	7.14286
Sample1041	Lung cancer	illumina_PANEL		0.24	957.931	44.8052
Sample1042	Lung cancer	illumina_PANEL		0.34	1049.81	4.54545
Sample1043	Hepatobiliary Cancer	illumina_PANEL		0.75	736.951	5.84416
Sample1044	Lung cancer	illumina_PANEL		0.25	1079.38	10.3896
Sample1045	Esophagogastric Cancer	illumina_PANEL		0.42	1554.02	7.14286
Sample1046	Lung cancer	illumina_PANEL		0.24	993.139	0.649351
Sample1047	Lung cancer	illumina_PANEL		0.7	1404.5	1.94805
Sample1048	Lung cancer	illumina_PANEL		1	997.797	0.649351
Sample1049	Lung cancer	illumina_PANEL		0.26	946.372	6.49351
Sample1050	Lung cancer	illumina_PANEL		1	1044.31	1.94805
Sample1051	Melanoma	illumina_PANEL	0.68	0.48	1533.99	3.8961
Sample1052	Esophagogastric Cancer	illumina_PANEL	0.55	0.58	940.3	1.94805
Sample1053	Lung cancer	illumina_PANEL		1	1040.04	0
Sample1054	Lung cancer	illumina_PANEL	0.2	0.96	744.348	8.44156
Sample1055	Lung cancer	illumina_PANEL	0.44	0.31	913.189	14.2857
Sample1056	Esophagogastric Cancer	illumina_PANEL		0.61	1139.99	2.5974
Sample1057	Lung cancer	illumina_PANEL		0.22	1007.13	1.94805
Sample1058	Lung cancer	illumina_PANEL		0.63	1016.45	4.54545
Sample1059	Lung cancer	illumina_PANEL		0.23	1637.57	2.40964
Sample1060	Lung cancer	illumina_PANEL		0.31	2410.07	9.09091
Sample1061	Melanoma	illumina_WES		0.82	344.236	8.2416
Sample1062	Lung cancer	illumina_PANEL	0.38		1191.12	7.22892
Sample1063	Lung cancer	illumina_PANEL		0.21	748.13	3.24675
Sample1064	Lung cancer	illumina_PANEL		1	1190.65	0.649351
Sample1065	Lung cancer	illumina_PANEL		0.24	1247.29	3.24675
Sample1066	Renal Cell Carcinoma	illumina_WES		0.29	431.127	5.72961
Sample1067	Lung cancer	illumina_PANEL		0.21	612.539	1.94805
Sample1068	Hepatobiliary Cancer	illumina_PANEL		0.36	819.81	2.5974
Sample1069	Lung cancer	illumina_PANEL	0.63	0.27	901.786	7.79221
Sample1070	Esophagogastric Cancer	illumina_PANEL		1	1229.9	5.19481
Sample1071	Hepatobiliary Cancer	illumina_WES		0.25	210.981	2.31442
Sample1072	Hepatobiliary Cancer	illumina_WES		0.74	302.556	0.84674
Sample1073	Hepatobiliary Cancer	illumina_WES		0.41	56.039	1.04431
Sample1074	Hepatobiliary Cancer	illumina_WES		0.48	81.726	2.59667
Sample1075	Hepatobiliary Cancer	illumina_PANEL		0.27	969.653	4.54545
Sample1076	Hepatobiliary Cancer	illumina_WES		0.29	229.443	3.02004
Sample1077	Hepatobiliary Cancer	illumina_PANEL		0.51	958.315	2.5974
Sample1078	Lung cancer	illumina_PANEL		0.36	1204.32	10.3896
Sample1079	Hepatobiliary Cancer	illumina_PANEL	0.1	0.31	1080	43.5065
Sample1080	Hepatobiliary Cancer	illumina_WES		0.33	262.012	4.43127
Sample1081	Lung cancer	illumina_PANEL		0.66	1156.34	0
Sample1082	Lung cancer	illumina_PANEL	0.72	0.28	615.676	1.94805
Sample1083	Lung cancer	illumina_PANEL		0.29	725.055	5.84416
Sample1084	Lung cancer	illumina_PANEL		0.37	675.231	3.24675
Sample1085	Lung cancer	illumina_PANEL		0.4	631.572	5.19481
Sample1086	Lung cancer	illumina_PANEL		0.27	937.08	6.49351
Sample1087	Lung cancer	illumina_PANEL		0.75	995.055	5.19481
Sample1088	Lung cancer	illumina_PANEL		0.21	1092.12	3.8961
Sample1089	Lung cancer	illumina_PANEL		0.48	725.058	5.19481
Sample1090	Lung cancer	illumina_PANEL		0.2	912.821	2.5974
Sample1091	Esophagogastric Cancer	illumina_PANEL		0.33	519.103	7.79221
Sample1092	Renal Cell Carcinoma	illumina_PANEL		0.84	631.573	9.74026
Sample1093	Lung cancer	illumina_PANEL		1	858.735	4.54545
Sample1094	Lung cancer	illumina_PANEL		0.27	564.887	5.19481
Sample1095	Lung cancer	illumina_PANEL	0.14	0.66	1293.86	6.0241
Sample1096	Renal Cell Carcinoma	illumina_PANEL		0.48	2737.01	8.43373
Sample1097	Melanoma	illumina_PANEL		0.46	1837.67	2.5974
Sample1098	Lung cancer	illumina_PANEL		0.33	2498.73	3.61446
Sample1099	Esophagogastric Cancer	illumina_PANEL		1	1670.69	4.81928
Sample1100	Lung cancer	illumina_PANEL	0.34	0.62	623.847	9.09091
Sample1101	Lung cancer	illumina_PANEL		0.32	754.375	18.1818
Sample1102	Lung cancer	illumina_PANEL			2336.19	15.6627
Sample1103	Lung cancer	illumina_PANEL	0.7	0.42	1484.87	8.44156
Sample1104	Esophagogastric Cancer	illumina_WES		0.28	302.957	4.3466
Sample1105	Lung cancer	illumina_PANEL		0.42	702.477	4.54545
Sample1106	Lung cancer	illumina_PANEL		0.27	1221.54	1.94805
Sample1107	Lung cancer	illumina_PANEL		0.28	1396.95	4.54545
Sample1108	Lung cancer	illumina_PANEL	0.72		2363.71	3.61446
Sample1109	Lung cancer	illumina_PANEL	0.25	0.27	934.134	12.987
Sample1110	Esophagogastric Cancer	illumina_WES		0.36	264.619	20.3782
Sample1111	Hepatobiliary Cancer	illumina_PANEL		0.62	864.187	2.5974
Sample1112	Melanoma	illumina_PANEL	0.96	0.5	856.064	1.2987
Sample1113	Pancreatic Cancer	illumina_PANEL		1	914.472	5.19481
Sample1114	Renal Cell Carcinoma	illumina_PANEL		0.51	1604.28	3.24675
Sample1115	Lung cancer	illumina_PANEL		0.31	1059.78	5.84416
Sample1116	Lung cancer	illumina_PANEL		0.29	1124.95	2.5974
Sample1117	Lung cancer	illumina_PANEL		0.49	588.841	2.5974
Sample1118	Melanoma	illumina_PANEL		1	2264.59	2.40964
Sample1119	Lung cancer	illumina_PANEL		0.22	556.43	14.2857
Sample1120	Hepatobiliary Cancer	illumina_PANEL		0.53	2230.18	2.40964
Sample1121	Lung cancer	illumina_PANEL		1	1112.21	0.649351
Sample1122	Melanoma	illumina_PANEL		0.55	1477.53	28.9157
Sample1123	Lung cancer	illumina_PANEL	0.16	1	898.349	0.649351
Sample1124	Lung cancer	illumina_PANEL		0.45	584.235	2.5974
Sample1125	Lung cancer	illumina_PANEL	0.1	0.69	1091.11	9.09091
Sample1126	Hepatobiliary Cancer	illumina_PANEL		0.3	709.716	4.54545
Sample1127	Pancreatic Cancer	illumina_PANEL		0.28	974.44	3.24675
Sample1128	Renal Cell Carcinoma	illumina_PANEL	0.92	0.39	817.242	23.3766
Sample1129	Lung cancer	illumina_PANEL		0.56	981.494	3.8961
Sample1130	Lung cancer	illumina_PANEL		0.56	819.022	9.09091
Sample1131	Lung cancer	illumina_PANEL		0.31	883.579	6.49351
Sample1132	Lung cancer	illumina_PANEL		1	1038.6	3.8961
Sample1133	Esophagogastric Cancer	illumina_PANEL		0.42	518.735	63.6364
Sample1134	Pancreatic Cancer	illumina_PANEL		0.3	2099.8	4.54545
Sample1135	Esophagogastric Cancer	illumina_PANEL		1	1924.97	3.61446
Sample1136	Lung cancer	illumina_PANEL	0.51	0.44	1021.83	1.2987
Sample1137	Hepatobiliary Cancer	illumina_PANEL		0.68	914.726	7.79221
Sample1138	Lung cancer	illumina_PANEL		0.99	873.484	3.8961
Sample1139	Lung cancer	illumina_WES	0.74	0.48	238.254	2.85069
Sample1140	Esophagogastric Cancer	illumina_PANEL		0.27	1324.54	5.84416
Sample1141	Pancreatic Cancer	illumina_PANEL		1	1008.03	2.5974
Sample1142	Hepatobiliary Cancer	illumina_PANEL		0.27	1310.09	1.94805
Sample1143	Esophagogastric Cancer	illumina_WES		0.34	350.487	146.091
Sample1144	Pancreatic Cancer	illumina_PANEL		0.55	1152.13	12.3377
Sample1145	Lung cancer	illumina_PANEL		0.26	1024.23	1.94805
Sample1146	Lung cancer	illumina_WES		0.32	277.217	0.169348
Sample1147	Hepatobiliary Cancer	illumina_WES		0.56	281.114	9.45526
Sample1148	Lung cancer	illumina_PANEL		0.28	1251.45	0.649351
Sample1149	Lung cancer	illumina_PANEL		0.55	815.706	1.2987
Sample1150	Lung cancer	illumina_PANEL		1	1198.01	1.2987
Sample1151	Lung cancer	illumina_PANEL	0.39		1913.31	1.20482
Sample1152	Breast Cancer	illumina_PANEL		0.54	722.929	20.1299
Sample1153	Lung cancer	illumina_PANEL		1	958.685	7.14286
Sample1154	Lung cancer	illumina_PANEL	0.43	1	1140.87	1.2987
Sample1155	Lung cancer	illumina_WES		0.35	253.379	1.12899
Sample1156	Lung cancer	illumina_PANEL		0.22	1028.48	0
Sample1157	Lung cancer	illumina_PANEL		0.23	1276.76	3.24675
Sample1158	Lung cancer	illumina_PANEL	0.32		1971.56	2.40964
Sample1159	Lung cancer	illumina_PANEL			4044.3	3.61446
Sample1160	Lung cancer	illumina_PANEL		0.32	1031.09	4.54545
Sample1161	Lung cancer	illumina_PANEL	0.45	0.2	556.671	1.2987
Sample1162	Esophagogastric Cancer	illumina_WES		1	296.326	0.987863
Sample1163	Lung cancer	illumina_PANEL	0.76	0.47	1263.82	7.14286
Sample1164	Lung cancer	illumina_PANEL	0.53	0.22	1022.93	1.2987
Sample1165	Lung cancer	illumina_PANEL		0.43	805.825	2.5974
Sample1166	Melanoma	illumina_PANEL		0.27	600.691	159.091
Sample1167	Melanoma	illumina_PANEL		0.69	956.23	2.5974
Sample1168	Lung cancer	illumina_PANEL		0.61	1209.94	5.84416
Sample1169	Lung cancer	illumina_PANEL		0.25	1006.02	3.24675
Sample1170	Lung cancer	illumina_PANEL		0.22	1014.62	1.94805
Sample1171	Lung cancer	illumina_PANEL	0.55	1	1152.02	2.5974
Sample1172	Lung cancer	illumina_PANEL		0.3	1218.71	5.19481
Sample1173	Lung cancer	illumina_PANEL	0.18	0.39	1051.95	3.24675
Sample1174	Lung cancer	illumina_PANEL		0.3	1095.33	0.649351
Sample1175	Lung cancer	illumina_PANEL		0.21	2139.44	3.61446
Sample1176	Lung cancer	illumina_PANEL		0.35	1248.77	1.94805
Sample1177	Lung cancer	illumina_PANEL		0.91	918.796	20.1299
Sample1178	Lung cancer	illumina_PANEL		0.4	1166.02	9.74026
Sample1179	Lung cancer	illumina_PANEL		1	723.828	2.5974
Sample1180	Lung cancer	illumina_PANEL		1	1730.58	0
Sample1181	Lung cancer	illumina_PANEL		1	1077.89	0.649351
Sample1182	Lung cancer	illumina_PANEL		0.32	602.639	12.3377
Sample1183	Lung cancer	illumina_PANEL		0.38	756.558	22.0779
Sample1184	Glioma	illumina_WES		0.94	173.336	6.20943
Sample1185	Glioma	illumina_WES		0.68	243.611	0.254022
Sample1186	Glioma	illumina_WES		0.81	201.997	1.49591
Sample1187	Glioma	illumina_WES		0.91	257.615	1.27011
Sample1188	Glioma	illumina_WES		0.69	171.227	1.9475
Sample1189	Glioma	illumina_WES		0.82	263.21	1.97573
Sample1190	Glioma	illumina_WES		0.73	343.268	0.677392
Sample1191	Glioma	illumina_WES		0.8	203.305	46.5143
Sample1192	Glioma	illumina_WES		0.38	331.206	2.03218
Sample1193	Lung cancer	illumina_PANEL		0.53	1131.7	1.94805
Sample1194	Lung cancer	illumina_PANEL	0.73	0.53	785.436	13.6364
Sample1195	Lung cancer	illumina_PANEL	0.58		2199.79	3.61446
Sample1196	Lung cancer	illumina_PANEL		0.23	1136.33	5.19481
Sample1197	Lung cancer	illumina_PANEL		1	976.752	0.649351
Sample1198	Lung cancer	illumina_PANEL	0.45	1	1262.79	1.2987
Sample1199	Lung cancer	illumina_PANEL		0.81	1294.68	5.84416
Sample1200	Lung cancer	illumina_PANEL		1	1192.08	3.8961
Sample1201	Lung cancer	illumina_WES		0.36	201.575	4.65707
Sample1202	Hepatobiliary Cancer	illumina_PANEL		0.27	930.16	3.8961
Sample1203	Lung cancer	illumina_PANEL		1	952.089	13.6364
Sample1204	Pancreatic Cancer	illumina_PANEL		0.21	906.603	3.8961
Sample1205	Lung cancer	illumina_PANEL		0.26	1039.88	12.3377
Sample1206	Esophagogastric Cancer	illumina_PANEL		0.29	604.688	86.3636
Sample1207	Lung cancer	illumina_PANEL		0.21	1206.83	9.09091
Sample1208	Melanoma	illumina_PANEL		0.86	1973.24	4.54545
Sample1209	Melanoma	illumina_PANEL		0.34	1110.88	6.49351
Sample1210	Esophagogastric Cancer	illumina_PANEL		0.39	382.976	49.3506
Sample1211	Esophagogastric Cancer	illumina_PANEL		0.33	878.948	2.5974
Sample1212	Melanoma	illumina_PANEL		0.31	971.79	20.1299
Sample1213	Lung cancer	illumina_PANEL		0.41	1002.64	7.79221
Sample1214	Lung cancer	illumina_WES		0.34	349.595	0.112899
Sample1215	Lung cancer	illumina_PANEL		0.72	983.501	3.24675
Sample1216	Renal Cell Carcinoma	illumina_PANEL		0.42	897.998	7.79221
Sample1217	Esophagogastric Cancer	illumina_WES		0.32	453.425	5.56026
Sample1218	Esophagogastric Cancer	illumina_PANEL		0.4	1638.76	5.84416
Sample1219	Lung cancer	illumina_PANEL		0.78	2612.58	4.81928
Sample1220	Breast Cancer	illumina_PANEL		0.63	938.312	1.94805
Sample1221	Lung cancer	illumina_PANEL		1	930.69	3.24675
Sample1222	Lung cancer	illumina_PANEL		0.35	1137.94	2.5974
Sample1223	Lung cancer	illumina_PANEL		0.36	846.373	3.24675
Sample1224	Lung cancer	illumina_PANEL		0.32	1121.74	3.24675
Sample1225	Lung cancer	illumina_PANEL		0.29	1255.58	10.3896
Sample1226	Lung cancer	illumina_PANEL		1	821.519	27.9221
Sample1227	Lung cancer	illumina_PANEL		0.26	922.374	140.909
Sample1228	Breast Cancer	illumina_PANEL		0.28	510.641	53.2468
Sample1229	Lung cancer	illumina_PANEL		0.48	887.284	6.49351
Sample1230	Lung cancer	illumina_PANEL		1	869.555	7.79221
Sample1231	Lung cancer	illumina_PANEL		0.21	944.43	35.0649
Sample1232	Lung cancer	illumina_PANEL		0.78	858.637	6.49351
Sample1233	Lung cancer	illumina_PANEL		0.32	856.964	1.94805
Sample1234	Lung cancer	illumina_PANEL		0.31	1303.96	11.6883
Sample1235	Breast Cancer	illumina_PANEL		0.33	876.434	3.8961
Sample1236	Lung cancer	illumina_PANEL		0.47	947.58	3.24675
Sample1237	Lung cancer	illumina_PANEL			3016.61	8.43373
Sample1238	Lung cancer	illumina_PANEL		0.33	1089.44	1.2987
Sample1239	Lung cancer	illumina_PANEL	0.7	0.73	837.92	7.79221
Sample1240	Lung cancer	illumina_PANEL	0.54	0.34	1022.2	3.24675
Sample1241	Lung cancer	illumina_PANEL	0.6	0.2	987.666	0
Sample1242	Lung cancer	illumina_PANEL		0.44	626.142	4.54545
Sample1243	Lung cancer	illumina_PANEL	0.56	0.32	1183.91	5.19481
Sample1244	Lung cancer	illumina_PANEL		0.37	578.163	5.84416
Sample1245	Esophagogastric Cancer	illumina_PANEL		0.53	836.2	1.94805
Sample1246	Renal Cell Carcinoma	illumina_PANEL		0.36	837.607	0.649351
Sample1247	Lung cancer	illumina_PANEL	0.72	0.74	1030.93	10.3896
Sample1248	Lung cancer	illumina_PANEL	0.16	1	1085.85	0
Sample1249	Lung cancer	illumina_PANEL	0.45	0.33	1199.92	9.09091
Sample1250	Lung cancer	illumina_PANEL		0.41	959.528	2.5974
Sample1251	Hepatobiliary Cancer	illumina_PANEL		0.41	674.101	1.2987
Sample1252	Hepatobiliary Cancer	illumina_WES		0.33	292.663	2.2862
Sample1253	Lung cancer	illumina_PANEL		1	995.734	0
Sample1254	Lung cancer	illumina_PANEL		0.3	657.487	3.24675
Sample1255	Hepatobiliary Cancer	illumina_PANEL	0.22	0.22	805.546	3.8961
Sample1256	Lung cancer	illumina_PANEL	0.29	0.38	891.913	9.74026
Sample1257	Lung cancer	illumina_PANEL		0.34	1220.53	4.54545
Sample1258	Lung cancer	illumina_PANEL		0.43	894.801	4.54545
Sample1259	Bladder Cancer	illumina_PANEL		0.24	736.768	5.84416
Sample1260	Lung cancer	illumina_PANEL	0.78	1	999.444	1.94805
Sample1261	Hepatobiliary Cancer	illumina_PANEL		0.43	1049.13	7.14286
Sample1262	Esophagogastric Cancer	illumina_PANEL	0.68	0.61	1294.82	8.44156
Sample1263	Hepatobiliary Cancer	illumina_PANEL		0.26	773.164	5.84416
Sample1264	Hepatobiliary Cancer	illumina_PANEL		1	1163.11	7.14286
Sample1265	Esophagogastric Cancer	illumina_PANEL	0.54	0.33	802.388	3.8961
Sample1266	Lung cancer	illumina_PANEL	0.85	0.3	639.939	5.19481
Sample1267	Lung cancer	illumina_PANEL	0.88	0.62	1211.13	4.54545
Sample1268	Lung cancer	illumina_PANEL	0.88	0.45	1583.55	9.09091
Sample1269	Lung cancer	illumina_PANEL	0.53	0.28	735.849	3.24675
Sample1270	Lung cancer	illumina_PANEL		0.24	587.911	1.2987
Sample1271	Lung cancer	illumina_PANEL		0.24	887.713	3.24675
Sample1272	Hepatobiliary Cancer	illumina_PANEL	0.74	0.48	603.155	1.94805
Sample1273	Pancreatic Cancer	illumina_PANEL		1	553.025	0
Sample1274	Lung cancer	illumina_PANEL	0.39	0.23	777.844	1.2987
Sample1275	Lung cancer	illumina_PANEL	0.32	0.21	612.726	0.649351
Sample1276	Renal Cell Carcinoma	illumina_PANEL	0.57	0.22	746.215	1.2987
Sample1277	Lung cancer	illumina_PANEL		1	858.264	0
Sample1278	Lung cancer	illumina_PANEL	0.34	0.22	794.442	1.2987
Sample1279	Lung cancer	illumina_PANEL	0.35	0.38	1148.43	0.649351
Sample1280	Esophagogastric Cancer	illumina_PANEL	0.37	1	1024.84	0
Sample1281	Lung cancer	illumina_PANEL		0.35	851.641	4.54545
Sample1282	Lung cancer	illumina_PANEL	0.12	1	1089.74	3.8961
Sample1283	Renal Cell Carcinoma	illumina_PANEL	0.14	1	911.958	2.5974
Sample1284	Lung cancer	illumina_PANEL	0.54	0.84	917.596	1.2987
Sample1285	Lung cancer	illumina_PANEL	0.39	0.24	856.591	4.54545
Sample1286	Lung cancer	illumina_PANEL		0.48	1269.54	2.5974
Sample1287	Lung cancer	illumina_PANEL	0.35	0.2	934.811	2.5974
Sample1288	Lung cancer	illumina_PANEL	0.54	0.36	1041.94	2.5974
Sample1289	Lung cancer	illumina_PANEL	0.91	0.25	1018.3	3.24675
Sample1290	Lung cancer	illumina_PANEL	0.95	0.43	963.781	5.19481
Sample1291	Lung cancer	illumina_PANEL	0.59	0.33	1139.03	2.5974
Sample1292	Lung cancer	illumina_PANEL		0.26	1754.04	1.2987
Sample1293	Lung cancer	illumina_PANEL		1	1165.46	12.3377
Sample1294	Lung cancer	illumina_PANEL	0.7	1	1101.58	0.649351
Sample1295	Lung cancer	illumina_PANEL	0.89	0.6	665.059	5.84416
Sample1296	Lung cancer	illumina_PANEL	0.71	0.87	713.376	2.5974
Sample1297	Lung cancer	illumina_PANEL		0.2	1017.33	3.24675
Sample1298	Lung cancer	illumina_PANEL			1731.16	3.61446
Sample1299	Lung cancer	illumina_PANEL	0.78	0.41	1385.78	5.19481
Sample1300	Lung cancer	illumina_PANEL		0.22	1137.3	3.24675
Sample1301	Lung cancer	illumina_PANEL	0.9	0.39	589.752	0.649351
Sample1302	Lung cancer	illumina_PANEL	0.79	1	2707.58	4.81928
Sample1303	Lung cancer	illumina_PANEL	0.2	1	891.995	10.3896
Sample1304	Esophagogastric Cancer	illumina_PANEL	0.65	0.29	1231.63	8.44156
Sample1305	Lung cancer	illumina_PANEL	0.72	1	623.399	6.49351
Sample1306	Lung cancer	illumina_PANEL	0.6	0.21	808.915	1.94805
Sample1307	Lung cancer	illumina_PANEL		0.37	756.585	5.84416
Sample1308	Lung cancer	illumina_PANEL		0.2	772.442	1.2987
Sample1309	Lung cancer	illumina_PANEL	0.91	1	1217.98	0.649351
Sample1310	Lung cancer	illumina_PANEL	0.55	1	2092.87	0.649351
Sample1311	Lung cancer	illumina_PANEL		0.29	951.542	9.09091
Sample1312	Hepatobiliary Cancer	illumina_PANEL	0.72	0.26	1116.1	3.24675
Sample1313	Lung cancer	illumina_PANEL		0.23	696.769	3.24675
Sample1314	Esophagogastric Cancer	illumina_PANEL	0.08	1	922.958	7.14286
Sample1315	Lung cancer	illumina_PANEL		0.31	835.532	22.7273
Sample1316	Hepatobiliary Cancer	illumina_PANEL		0.56	1267.23	13.253
Sample1317	Lung cancer	illumina_PANEL		0.4	744.265	4.54545
Sample1318	Hepatobiliary Cancer	illumina_PANEL		0.34	984.008	0
Sample1319	Hepatobiliary Cancer	illumina_PANEL		0.26	764.464	0
Sample1320	Hepatobiliary Cancer	illumina_PANEL	0.82	0.71	988.692	1.94805
Sample1321	Melanoma	illumina_PANEL		0.22	938.713	2.5974
Sample1322	Hepatobiliary Cancer	illumina_PANEL	0.45	0.38	885.233	3.24675
Sample1323	Renal Cell Carcinoma	illumina_PANEL		0.49	905.759	1.2987
Sample1324	Lung cancer	illumina_PANEL		0.52	669.419	29.2208
Sample1325	Hepatobiliary Cancer	illumina_PANEL		0.36	1020.86	3.8961
Sample1326	Lung cancer	illumina_PANEL	0.57	1	763.341	15.5844
Sample1327	Melanoma	illumina_PANEL	0.76	0.39	1055.18	5.84416
Sample1328	Lung cancer	illumina_PANEL		0.24	930.128	3.8961
Sample1329	Prostate Cancer	illumina_PANEL	0.38	0.23	961.684	2.5974
Sample1330	Lung cancer	illumina_PANEL		0.7	902.01	9.74026
Sample1331	Melanoma	illumina_PANEL		0.28	922.849	1.94805
Sample1332	Melanoma	illumina_WES		0.29	278.736	0.705617
Sample1333	Lung cancer	illumina_PANEL	0.9	0.63	966.864	14.2857
Sample1334	Lung cancer	illumina_PANEL		0.93	888.265	5.19481
Sample1335	Melanoma	illumina_PANEL		1	1266.83	2.5974
Sample1336	Lung cancer	illumina_PANEL	0.38	0.26	1527.41	3.8961
Sample1337	Lung cancer	illumina_PANEL	0.58		2265.65	2.40964
Sample1338	Lung cancer	illumina_PANEL	0.82	0.76	951.751	3.8961
Sample1339	Pancreatic Cancer	illumina_PANEL	0.7	0.67	605.082	3.8961
Sample1340	Hepatobiliary Cancer	illumina_PANEL		0.25	873.335	0
Sample1341	Lung cancer	illumina_PANEL		0.42	2568.74	0
Sample1342	Hepatobiliary Cancer	illumina_PANEL		0.23	1096.33	3.24675
Sample1343	Lung cancer	illumina_PANEL		0.32	1201.37	6.49351
Sample1344	Pancreatic Cancer	illumina_PANEL		0.51	1226.37	1.2987
Sample1345	Lung cancer	illumina_PANEL			1912.73	4.81928
Sample1346	Lung cancer	illumina_PANEL		0.25	1164.19	2.5974
Sample1347	Lung cancer	illumina_PANEL		0.54	1221.5	5.19481
Sample1348	Lung cancer	illumina_PANEL	0.22		1975.45	2.40964
Sample1349	Lung cancer	illumina_PANEL	0.06		2923.67	1.20482
Sample1350	Lung cancer	illumina_PANEL		0.65	619.629	3.8961
Sample1351	Lung cancer	illumina_PANEL	0.84	0.42	977.575	9.09091
Sample1352	Lung cancer	illumina_PANEL	0.92		2029.92	4.81928
Sample1353	Hepatobiliary Cancer	illumina_WES		0.43	370.248	18.1485
Sample1354	Lung cancer	illumina_WES	0.22	1	484.278	1.15721
Sample1355	Lung cancer	illumina_PANEL		1	840.131	3.24675
Sample1356	Lung cancer	illumina_PANEL		0.23	1086.37	1.2987
Sample1357	Lung cancer	illumina_PANEL		0.23	765.276	7.14286
Sample1358	Lung cancer	illumina_PANEL	0.56	0.39	1029.27	4.54545
Sample1359	Lung cancer	illumina_PANEL		0.53	1058.14	1.94805
Sample1360	Lung cancer	illumina_PANEL		0.51	1047.02	9.74026
Sample1361	Lung cancer	illumina_PANEL	0.55	0.2	1240.22	5.84416
Sample1362	Lung cancer	illumina_PANEL	0.09		1865.18	6.0241
Sample1363	Lung cancer	illumina_PANEL		0.55	598.602	12.3377
Sample1364	Lung cancer	illumina_PANEL		0.28	1229.8	18.1818
Sample1365	Lung cancer	illumina_PANEL			1825.92	3.61446
Sample1366	Pancreatic Cancer	illumina_WES		0.3	265.767	0.169348
Sample1367	Lung cancer	illumina_PANEL		1	1164.17	2.5974
Sample1368	Esophagogastric Cancer	illumina_PANEL		0.45	1190.42	8.44156
Sample1369	Esophagogastric Cancer	illumina_WES		0.42	267.95	3.58453
Sample1370	Hepatobiliary Cancer	illumina_PANEL	0.83	0.46	679.37	2.5974
Sample1371	Lung cancer	illumina_PANEL		1	843.932	0
Sample1372	Lung cancer	illumina_PANEL	0.64	0.25	1809.91	13.6364
Sample1373	Esophagogastric Cancer	illumina_PANEL		0.27	1006.2	0
Sample1374	Lung cancer	illumina_PANEL		0.23	1073.8	5.19481
Sample1375	Lung cancer	illumina_PANEL	0.48		2401.2	1.20482
Sample1376	Lung cancer	illumina_PANEL	0.83	0.34	1000.75	5.84416
Sample1377	Lung cancer	illumina_PANEL		0.2	740.998	0
Sample1378	Lung cancer	illumina_PANEL		0.46	887.65	6.49351
Sample1379	Lung cancer	illumina_PANEL	0.65	0.5	1561.89	8.44156
Sample1380	Lung cancer	illumina_PANEL	0.52	0.71	1159.98	24.026
Sample1381	Lung cancer	illumina_PANEL		0.39	1107.19	11.039
Sample1382	Lung cancer	illumina_PANEL	0.71	0.24	2179.85	4.81928
Sample1383	Lung cancer	illumina_PANEL		0.32	904.212	12.3377
Sample1384	Lung cancer	illumina_PANEL		0.22	1625.86	7.22892
Sample1385	Lung cancer	illumina_PANEL	0.72	0.23	775.225	3.24675
Sample1386	Lung cancer	illumina_PANEL	0.38		2492.44	7.22892
Sample1387	Lung cancer	illumina_PANEL	0.47	0.38	889.339	2.5974
Sample1388	Lung cancer	MGI_PANEL	0.08	1	1211.15	3.62079
Sample1389	Lung cancer	illumina_PANEL		0.41	787.238	6.49351
Sample1390	Lung cancer	illumina_PANEL			1864.59	8.43373
Sample1391	Lung cancer	illumina_PANEL			2564.82	3.61446
Sample1392	Lung cancer	illumina_PANEL	0.52	0.25	789.698	3.8961
Sample1393	Lung cancer	illumina_PANEL		0.24	1230.55	8.44156
Sample1394	Lung cancer	illumina_PANEL	0.97	0.49	1311.01	5.84416
Sample1395	Lung cancer	illumina_PANEL		0.23	1213.57	3.8961
Sample1396	Lung cancer	illumina_PANEL			1646.71	2.40964
Sample1397	Lung cancer	illumina_PANEL		0.47	1046.23	49.3506
Sample1398	Lung cancer	illumina_PANEL		0.39	741.46	7.14286
Sample1399	Lung cancer	illumina_PANEL		0.24	719.623	5.19481
Sample1400	Hepatobiliary Cancer	illumina_PANEL		0.85	1173.67	4.54545
Sample1401	Lung cancer	illumina_PANEL		0.45	866.431	5.19481
Sample1402	Lung cancer	illumina_PANEL		0.42	1396.99	5.19481
Sample1403	Lung cancer	illumina_PANEL		0.72	983.241	3.24675
Sample1404	Esophagogastric Cancer	illumina_PANEL		0.31	931.948	2.5974
Sample1405	Esophagogastric Cancer	illumina_PANEL		0.81	1238	0.649351
Sample1406	Lung cancer	illumina_PANEL		0.4	1124.72	27.9221
Sample1407	Lung cancer	illumina_PANEL		0.5	2177.6	0.649351
Sample1408	Lung cancer	illumina_PANEL	0.74	0.24	1553.34	7.14286
Sample1409	Lung cancer	illumina_PANEL		0.47	2759.52	7.22892
Sample1410	Lung cancer	illumina_PANEL	0.93	0.42	500.318	7.14286
Sample1411	Esophagogastric Cancer	illumina_PANEL		1	790.643	0
Sample1412	Lung cancer	illumina_PANEL		0.21	1157.39	4.54545
Sample1413	Lung cancer	illumina_PANEL		1	2295.64	4.81928
Sample1414	Lung cancer	illumina_PANEL	0.64	0.27	1094.97	6.49351
Sample1415	Lung cancer	illumina_PANEL	0.86	0.62	925.972	0.649351
Sample1416	Lung cancer	illumina_PANEL	0.34	0.27	2051.91	14.4578
Sample1417	Lung cancer	illumina_PANEL	0.7	0.26	986.342	1.2987
Sample1418	Lung cancer	illumina_PANEL		0.44	731.795	74.6753
Sample1419	Lung cancer	illumina_PANEL		0.2	1138.85	5.19481
Sample1420	Lung cancer	illumina_PANEL		1	632.422	3.24675
Sample1421	Hepatobiliary Cancer	illumina_PANEL		1	1316.41	2.5974
Sample1422	Lung cancer	illumina_PANEL	0.82		1948.83	8.43373
Sample1423	Lung cancer	illumina_PANEL		0.69	982.728	7.79221
Sample1424	Hepatobiliary Cancer	illumina_PANEL		0.61	1024.4	1.2987
Sample1425	Lung cancer	illumina_PANEL		0.56	1087.14	10.3896
Sample1426	Lung cancer	illumina_PANEL		0.4	788.113	1.2987
Sample1427	Esophagogastric Cancer	illumina_PANEL		1	944.475	5.19481
Sample1428	Lung cancer	illumina_PANEL		0.47	1053.52	2.5974
Sample1429	Lung cancer	illumina_PANEL		0.3	920.048	1.2987
Sample1430	Lung cancer	illumina_PANEL		0.69	700.159	9.74026
Sample1431	Lung cancer	illumina_PANEL	0.66	1	1015.72	3.24675
Sample1432	Lung cancer	illumina_PANEL	0.27	0.22	847.149	1.2987
Sample1433	Lung cancer	illumina_PANEL		0.28	1467.34	9.09091
Sample1434	Lung cancer	illumina_PANEL		0.47	1023.5	9.74026
Sample1435	Lung cancer	MGI_PANEL	0.07	1	1509.3	6.34824
Sample1436	Lung cancer	illumina_PANEL	0.33	0.7	1100.64	4.54545
Sample1437	Lung cancer	illumina_PANEL		0.26	853.058	3.8961
Sample1438	Lung cancer	illumina_PANEL			1191.77	12.0482
Sample1439	Esophagogastric Cancer	illumina_PANEL		1	933.926	8.44156
Sample1440	Hepatobiliary Cancer	illumina_WES	0.68	0.66	301.914	2.62489
Sample1441	Lung cancer	illumina_WES		0.3	231.599	2.56844
Sample1442	Lung cancer	illumina_WES		0.26	214.32	2.48377
Sample1443	Lung cancer	illumina_PANEL			1858.82	0
Sample1444	Lung cancer	illumina_PANEL		0.26	2653.39	6.0241
Sample1445	Bladder Cancer	illumina_PANEL	0.4	0.27	2123.64	8.43373
Sample1446	Lung cancer	illumina_PANEL		1	890.616	5.84416
Sample1447	Lung cancer	illumina_PANEL	0.14	0.33	1047.34	5.84416
Sample1448	Lung cancer	illumina_PANEL		0.35	831.852	2.5974
Sample1449	Lung cancer	illumina_PANEL	0.96	0.28	1108.98	3.8961
Sample1450	Lung cancer	illumina_PANEL	0.87	0.25	926.485	1.94805
Sample1451	Lung cancer	illumina_PANEL	0.45	0.2	1123.23	1.2987
Sample1452	Lung cancer	illumina_PANEL		0.29	1038.35	2.5974
Sample1453	Lung cancer	illumina_PANEL	0.27	0.45	1086.16	5.19481
Sample1454	Lung cancer	illumina_PANEL	0.8	0.41	955.633	3.8961
Sample1455	Pancreatic Cancer	illumina_PANEL		1	1165.12	2.5974
Sample1456	Lung cancer	illumina_PANEL	0.67	1	1135.11	1.94805
Sample1457	Lung cancer	illumina_PANEL	0.67	0.6	769.776	5.19481
Sample1458	Lung cancer	illumina_PANEL		1	977.991	8.44156
Sample1459	Lung cancer	illumina_PANEL		0.21	562.442	0
Sample1460	Lung cancer	illumina_PANEL		0.26	810.75	0
Sample1461	Lung cancer	illumina_PANEL		1	1003.27	0.649351
Sample1462	Lung cancer	illumina_WES		0.78	244.445	1.74993
Sample1463	Bladder Cancer	illumina_PANEL		0.61	1804.96	1.20482
Sample1464	Lung cancer	illumina_PANEL		0.21	892.694	3.24675
Sample1465	Lung cancer	illumina_PANEL	0.41	0.84	1361.31	1.94805
Sample1466	Lung cancer	illumina_PANEL	0.14	0.46	1681.1	1.20482
Sample1467	Lung cancer	illumina_PANEL		0.25	1968.65	7.22892
Sample1468	Lung cancer	illumina_PANEL	0.78	0.36	1525.53	3.61446
Sample1469	Lung cancer	illumina_PANEL	0.6	0.21	2198.79	7.22892
Sample1470	Lung cancer	illumina_PANEL	0.64	1	1888.17	1.20482
Sample1471	Lung cancer	illumina_PANEL	0.97	0.89	1529.5	11.039
Sample1472	Pancreatic Cancer	illumina_PANEL		0.2	771.141	3.8961
Sample1473	Hepatobiliary Cancer	illumina_PANEL	0.46	0.37	1062.16	2.5974
Sample1474	Hepatobiliary Cancer	illumina_PANEL		0.33	1127.97	0
Sample1475	Lung cancer	illumina_PANEL		0.24	1045.55	7.14286
Sample1476	Esophagogastric Cancer	illumina_PANEL	0.08	0.26	560.041	8.44156
Sample1477	Lung cancer	illumina_PANEL		1	2617.34	4.81928
Sample1478	Lung cancer	illumina_PANEL		0.21	1166.53	1.2987
Sample1479	Lung cancer	illumina_PANEL	0.55	0.54	786.514	9.09091
Sample1480	Lung cancer	illumina_PANEL		0.41	1044.28	1.2987
Sample1481	Lung cancer	illumina_PANEL		0.31	803.874	1.2987
Sample1482	Lung cancer	illumina_PANEL		0.36	963.222	1.94805
Sample1483	Esophagogastric Cancer	illumina_WES		0.27	262.811	4.31837
Sample1484	Esophagogastric Cancer	illumina_WES	0.5	0.33	144.788	2.42732
Sample1485	Lung cancer	illumina_PANEL		1	744.372	2.5974
Sample1486	Lung cancer	illumina_PANEL	0.55	0.31	734.968	2.5974
Sample1487	Lung cancer	illumina_PANEL	0.22	0.42	720.491	9.74026
Sample1488	Lung cancer	illumina_PANEL	0.33	1	1030.82	8.44156
Sample1489	Esophagogastric Cancer	illumina_PANEL	0.64	0.2	489.558	2.5974
Sample1490	Lung cancer	illumina_PANEL		0.53	797.627	14.9351
Sample1491	Lung cancer	illumina_PANEL	0.36	0.78	819.131	3.8961
Sample1492	Hepatobiliary Cancer	illumina_PANEL		0.3	2249.55	3.61446
Sample1493	Hepatobiliary Cancer	illumina_PANEL	0.72	1	2222.53	7.22892
Sample1494	Lung cancer	illumina_PANEL	0.38	0.86	987.229	1.2987
Sample1495	Lung cancer	illumina_PANEL	0.85	0.41	878.478	8.44156
Sample1496	Lung cancer	illumina_PANEL		0.2	701.718	5.19481
Sample1497	Renal Cell Carcinoma	illumina_PANEL		0.58	695.589	5.19481
Sample1498	Lung cancer	illumina_PANEL		0.21	1789.46	3.61446
Sample1499	Lung cancer	illumina_PANEL	0.83	0.24	1668.54	7.22892
Sample1500	Lung cancer	illumina_PANEL	0.87	0.35	750.564	1.94805
Sample1501	Lung cancer	illumina_PANEL	0.78	0.62	1010.69	3.8961
Sample1502	Melanoma	illumina_PANEL	0.7	0.65	1036.22	3.24675
Sample1503	Lung cancer	illumina_PANEL		0.28	1475.63	1.94805
Sample1504	Lung cancer	illumina_PANEL		0.27	842.304	12.3377
Sample1505	Lung cancer	illumina_PANEL	0.79	0.51	866.086	5.19481
Sample1506	Lung cancer	illumina_PANEL	0.94		1046.49	12.0482
Sample1507	Lung cancer	illumina_PANEL		0.31	835.313	4.54545
Sample1508	Lung cancer	illumina_PANEL		1	1102	0
Sample1509	Lung cancer	illumina_PANEL	0.45	0.23	1108.54	0.649351
Sample1510	Lung cancer	illumina_PANEL	0.32	0.39	1108.82	0.649351
Sample1511	Lung cancer	illumina_PANEL			1991.27	1.20482
Sample1512	Lung cancer	illumina_PANEL		0.39	703.313	5.19481
Sample1513	Lung cancer	illumina_PANEL	0.82	0.31	936.359	5.19481
Sample1514	Hepatobiliary Cancer	illumina_PANEL		0.29	807.912	25.3247
Sample1515	Lung cancer	illumina_PANEL		0.33	698.019	16.8831
Sample1516	Esophagogastric Cancer	illumina_WES	0.88	0.53	132.184	8.07226
Sample1517	Lung cancer	illumina_PANEL		0.38	1026.9	1.2987
Sample1518	Lung cancer	illumina_PANEL	0.94	0.21	1113.18	3.8961
Sample1519	Lung cancer	illumina_PANEL	0.45	0.21	968.657	2.5974
Sample1520	Melanoma	illumina_PANEL		0.83	1245.01	3.24675
Sample1521	Esophagogastric Cancer	illumina_PANEL		0.24	884.792	3.24675
Sample1522	Lung cancer	illumina_PANEL		1	669.539	12.3377
Sample1523	Lung cancer	illumina_PANEL		0.54	2407.97	4.81928
Sample1524	Lung cancer	illumina_PANEL	0.08	0.22	1087.98	4.54545
Sample1525	Lung cancer	illumina_PANEL	0.92	0.24	842.218	1.2987
Sample1526	Lung cancer	illumina_PANEL	0.75	1	1076.01	3.8961
Sample1527	Melanoma	illumina_PANEL	0.97	0.47	1286.85	1.94805
Sample1528	Melanoma	illumina_PANEL		1	1096.56	0
Sample1529	Lung cancer	illumina_PANEL		0.29	818.426	0.649351
Sample1530	Lung cancer	illumina_PANEL		0.46	666.857	3.8961
Sample1531	Lung cancer	illumina_PANEL	0.34	0.26	782.947	2.5974
Sample1532	Lung cancer	illumina_PANEL		0.31	775.313	1.94805
Sample1533	Lung cancer	illumina_PANEL		0.3	789.115	3.8961
Sample1534	Lung cancer	illumina_PANEL		0.48	525.863	7.79221
Sample1535	Esophagogastric Cancer	illumina_PANEL	0.53	0.38	678.235	48.0519
Sample1536	Lung cancer	illumina_PANEL		1	736.418	1.2987
Sample1537	Lung cancer	illumina_PANEL	0.82	0.35	2573.34	4.81928
Sample1538	Esophagogastric Cancer	illumina_WES	0.39	0.29	290.382	4.82642
Sample1539	Esophagogastric Cancer	illumina_WES		0.22	351.435	3.24584
Sample1540	Esophagogastric Cancer	illumina_PANEL		0.52	791.855	6.49351
Sample1541	Esophagogastric Cancer	illumina_WES	0.72	0.35	201.885	5.30624
Sample1542	Renal Cell Carcinoma	illumina_PANEL	0.43	0.29	1148.94	4.54545
Sample1543	Lung cancer	illumina_PANEL		0.34	3123.35	4.81928
Sample1544	Esophagogastric Cancer	illumina_WES		0.35	299.611	0.451595
Sample1545	Melanoma	illumina_PANEL		0.92	780.57	1.94805
Sample1546	Lung cancer	illumina_PANEL		1	1040.02	2.5974
Sample1547	Hepatobiliary Cancer	illumina_PANEL		0.22	940.77	0.649351
Sample1548	Esophagogastric Cancer	illumina_PANEL	0.55	0.36	861.111	7.14286
Sample1549	Lung cancer	illumina_PANEL	0.39	0.34	807.234	1.94805
Sample1550	Breast Cancer	illumina_PANEL		0.6	1005.3	2.5974
Sample1551	Lung cancer	illumina_PANEL		0.2	735.516	4.54545
Sample1552	Lung cancer	illumina_PANEL	0.15	0.54	555.24	9.74026
Sample1553	Hepatobiliary Cancer	illumina_PANEL	0.08	0.24	611.799	15.5844
Sample1554	Lung cancer	illumina_PANEL		0.25	629.014	8.44156
Sample1555	Lung cancer	illumina_PANEL	0.78	1	1230.12	2.5974
Sample1556	Lung cancer	illumina_PANEL	0.8	0.29	2042.06	0
Sample1557	Lung cancer	illumina_PANEL		0.76	1797.1	4.81928
Sample1558	Lung cancer	illumina_PANEL			3783.7	2.40964
Sample1559	Lung cancer	illumina_PANEL		0.34	1059.69	2.5974
Sample1560	Lung cancer	illumina_PANEL	0.44	0.43	1535.58	1.2987
Sample1561	Lung cancer	illumina_PANEL		1	1116.03	1.2987
Sample1562	Melanoma	illumina_PANEL		0.21	976.379	0
Sample1563	Melanoma	illumina_PANEL	0.62	0.41	942.034	0.649351
Sample1564	Esophagogastric Cancer	illumina_PANEL		0.21	907.348	5.19481
Sample1565	Lung cancer	illumina_PANEL	0.9		2985.16	2.40964
Sample1566	Lung cancer	illumina_PANEL	0.08		3965.52	1.20482
Sample1567	Lung cancer	illumina_PANEL	0.99	0.38	569.575	5.84416
Sample1568	Lung cancer	illumina_PANEL	0.98	0.33	771.893	6.49351
Sample1569	Lung cancer	illumina_PANEL		1	2225.3	0
Sample1570	Lung cancer	illumina_PANEL			1835.05	2.40964
Sample1571	Lung cancer	illumina_PANEL		0.42	970.598	0
Sample1572	Esophagogastric Cancer	illumina_PANEL		1	966.232	1.2987
Sample1573	Esophagogastric Cancer	illumina_WES		0.5	232.549	6.57635
Sample1574	Lung cancer	illumina_PANEL	0.71	0.39	1415.82	0.649351
Sample1575	Lung cancer	illumina_PANEL	0.8	0.43	938.815	5.84416
Sample1576	Lung cancer	illumina_PANEL			3068.84	6.0241
Sample1577	Lung cancer	illumina_PANEL	0.86	0.2	863.37	3.24675
Sample1578	Lung cancer	illumina_PANEL	0.26	0.32	990.875	19.4805
Sample1579	Lung cancer	illumina_PANEL		1	743.049	0.649351
Sample1580	Lung cancer	illumina_WES		0.4	263.124	21.1121
Sample1581	Lung cancer	illumina_WES	0.24	0.76	253.226	11.3181
Sample1582	Lung cancer	illumina_PANEL		0.48	726.543	3.24675
Sample1583	Lung cancer	illumina_PANEL		0.27	889.755	11.6883
Sample1584	Hepatobiliary Cancer	illumina_PANEL		0.58	773.953	3.8961
Sample1585	Lung cancer	illumina_PANEL	0.96	0.56	927.272	3.24675
Sample1586	Lung cancer	illumina_PANEL	0.66	0.51	875.576	2.5974
Sample1587	Esophagogastric Cancer	illumina_WES		1	311.72	1.55236
Sample1588	Lung cancer	illumina_WES		0.55	283.357	3.13294
Sample1589	Lung cancer	illumina_WES		0.33	337.047	2.31442
Sample1590	Lung cancer	illumina_WES		0.93	363.588	5.61671
Sample1591	Lung cancer	illumina_WES		0.28	400.631	1.04431
Sample1592	Lung cancer	illumina_WES		1	288.65	1.60881
Sample1593	Lung cancer	illumina_WES		1	239.945	5.22156
Sample1594	Lung cancer	illumina_PANEL	0.95		2265.5	4.81928
Sample1595	Lung cancer	illumina_PANEL	0.44	1	916.071	2.5974
Sample1596	Lung cancer	illumina_PANEL		0.44	1590.81	12.0482
Sample1597	Lung cancer	illumina_PANEL	0.43	0.26	834.732	7.79221
Sample1598	Lung cancer	illumina_PANEL		0.33	1108.06	3.24675
Sample1599	Lung cancer	illumina_PANEL	0.82	0.45	841.789	9.09091
Sample1600	Lung cancer	illumina_PANEL		1	928.365	5.19481
Sample1601	Lung cancer	illumina_PANEL	0.72	0.37	744.064	0.649351
Sample1602	Lung cancer	illumina_PANEL	0.46	1	881.384	0.649351
Sample1603	Lung cancer	illumina_PANEL	0.51	0.65	650.229	12.987
Sample1604	Lung cancer	illumina_PANEL		0.21	1557.48	3.61446
Sample1605	Lung cancer	illumina_PANEL	0.16	0.36	974.787	3.24675
Sample1606	Lung cancer	illumina_PANEL		0.46	1023	3.8961
Sample1607	Lung cancer	illumina_PANEL		0.35	1940.81	2.40964
Sample1608	Lung cancer	illumina_PANEL	0.05	1	1036.86	1.2987
Sample1609	Lung cancer	illumina_PANEL		0.4	1104.76	3.8961
Sample1610	Lung cancer	illumina_PANEL		0.42	1344.6	3.61446
Sample1611	Lung cancer	illumina_PANEL	0.73	0.4	976.194	11.039
Sample1612	Lung cancer	illumina_PANEL	0.85	0.26	869.459	6.49351
Sample1613	Lung cancer	illumina_PANEL	0.81	0.33	352.124	6.49351
Sample1614	Hepatobiliary Cancer	illumina_PANEL	0.74	0.44	607.352	1.2987
Sample1615	Hepatobiliary Cancer	illumina_PANEL		0.53	884.354	3.24675
Sample1616	Hepatobiliary Cancer	illumina_PANEL		0.77	955.887	4.54545
Sample1617	Lung cancer	illumina_PANEL		0.26	1185.92	7.79221
Sample1618	Lung cancer	illumina_PANEL	0.42	1	1045.41	0.649351
Sample1619	Hepatobiliary Cancer	illumina_PANEL	0.62	0.46	929.603	2.5974
Sample1620	Lung cancer	illumina_PANEL	0.58	0.46	753.698	0.649351
Sample1621	Hepatobiliary Cancer	illumina_PANEL	0.82	0.23	951.414	1.2987
Sample1622	Melanoma	illumina_PANEL		0.75	1383.75	3.24675
Sample1623	Lung cancer	illumina_PANEL		1	788.979	1.2987
Sample1624	Melanoma	illumina_PANEL		1	849.935	0
Sample1625	Melanoma	illumina_PANEL	0.27	0.33	954.296	3.24675
Sample1626	Esophagogastric Cancer	illumina_PANEL	0.15	0.22	589.105	5.19481
Sample1627	Lung cancer	illumina_PANEL	0.57	0.24	989.747	4.54545
Sample1628	Lung cancer	illumina_PANEL		1	1277.22	1.2987
Sample1629	Lung cancer	illumina_PANEL	0.18	0.23	716.282	5.84416
Sample1630	Lung cancer	illumina_PANEL	0.23	0.33	677.702	7.14286
Sample1631	Lung cancer	illumina_PANEL		0.25	860.603	3.24675
Sample1632	Lung cancer	illumina_PANEL	0.45	1	809.309	5.84416
Sample1633	Lung cancer	illumina_PANEL		0.32	1135.58	1.94805
Sample1634	Hepatobiliary Cancer	illumina_PANEL	0.22	0.22	778.246	48.7013
Sample1635	Lung cancer	illumina_PANEL		0.45	852.441	3.8961
Sample1636	Lung cancer	illumina_PANEL	0.87	0.42	767.857	5.84416
Sample1637	Esophagogastric Cancer	illumina_PANEL		1	766.182	7.14286
Sample1638	Bladder Cancer	illumina_PANEL	0.69	0.2	865.884	9.09091
Sample1639	Esophagogastric Cancer	illumina_PANEL		0.21	772.575	2.5974
Sample1640	Lung cancer	illumina_WES		0.9	286.981	4.79819
Sample1641	Lung cancer	illumina_PANEL	0.67	0.36	998.851	1.94805
Sample1642	Lung cancer	illumina_PANEL	0.69	0.47	819.039	18.1818
Sample1643	Lung cancer	illumina_PANEL		0.22	960.986	0.649351
Sample1644	Lung cancer	illumina_PANEL	0.7	0.45	754.317	9.09091
Sample1645	Esophagogastric Cancer	illumina_PANEL		0.28	1106.91	1.94805
Sample1646	Lung cancer	illumina_PANEL		1	1167.59	6.49351
Sample1647	Breast Cancer	illumina_PANEL		0.35	1811.15	1.20482
Sample1648	Lung cancer	illumina_PANEL	0.4	0.36	911.833	5.19481
Sample1649	Melanoma	illumina_PANEL		0.62	886.538	3.24675
Sample1650	Esophagogastric Cancer	illumina_PANEL		0.24	1174.24	0
Sample1651	Lung cancer	illumina_PANEL	0.75	1	932.932	10.3896
Sample1652	Melanoma	illumina_PANEL	0.85	0.56	764.113	1.2987
Sample1653	Hepatobiliary Cancer	illumina_PANEL		0.27	986.787	3.24675
Sample1654	Lung cancer	illumina_PANEL		0.57	819.464	4.54545
Sample1655	Lung cancer	MGI_PANEL	0.6	1	1504.42	3.17412
Sample1656	Hepatobiliary Cancer	illumina_PANEL		0.29	1218.51	1.2987
Sample1657	Melanoma	illumina_PANEL	0.95	0.73	695.338	2.5974
Sample1658	Melanoma	illumina_PANEL	0.05	0.27	380.349	0
Sample1659	Melanoma	illumina_PANEL	0.05	0.28	827.358	0
Sample1660	Lung cancer	illumina_WES	0.7	0.94	200.366	4.79819
Sample1661	Lung cancer	illumina_PANEL	0.78	0.54	673.375	2.5974
Sample1662	Lung cancer	illumina_PANEL		0.73	1014.27	9.09091
Sample1663	Lung cancer	illumina_PANEL			1976.07	0
Sample1664	Lung cancer	illumina_PANEL			1826.69	2.40964
Sample1665	Lung cancer	illumina_PANEL		0.68	1911.69	15.6627
Sample1666	Hepatobiliary Cancer	illumina_PANEL		0.33	693.108	4.54545
Sample1667	Esophagogastric Cancer	illumina_PANEL	0.48	0.23	814.33	5.19481
Sample1668	Lung cancer	illumina_PANEL		0.34	767.027	12.987
Sample1669	Lung cancer	illumina_WES		0.49	268.518	0.874965
Sample1670	Lung cancer	illumina_PANEL	0.38	0.34	741.182	4.54545
Sample1671	Lung cancer	illumina_PANEL	0.98	0.37	1915.37	2.40964
Sample1672	Lung cancer	illumina_PANEL	0.8	0.25	1190.13	3.8961
Sample1673	Lung cancer	illumina_PANEL		0.38	860.315	1.2987
Sample1674	Lung cancer	illumina_PANEL	0.77	0.29	812.291	7.79221
Sample1675	Lung cancer	illumina_PANEL		1	2180.37	0
Sample1676	Lung cancer	illumina_PANEL		0.29	619.861	0.649351
Sample1677	Lung cancer	illumina_PANEL	0.24	0.23	872.488	1.94805
Sample1678	Lung cancer	illumina_PANEL	0.56	1	1101.07	0.649351
Sample1679	Lung cancer	illumina_PANEL	0.72	1	952.142	1.94805
Sample1680	Lung cancer	illumina_PANEL	0.38	0.23	988.609	2.5974
Sample1681	Lung cancer	illumina_PANEL		0.33	712.585	2.5974
Sample1682	Lung cancer	illumina_PANEL		0.2	1107.49	0
Sample1683	Lung cancer	illumina_PANEL		1	857.414	1.2987
Sample1684	Lung cancer	illumina_PANEL	0.33	0.3	773.871	0.649351
Sample1685	Lung cancer	illumina_PANEL	0.23	1	2097.6	0
Sample1686	Lung cancer	illumina_PANEL	0.9	0.4	1171.94	7.79221
Sample1687	Esophagogastric Cancer	illumina_PANEL		0.37	951.258	1.2987
Sample1688	Esophagogastric Cancer	illumina_PANEL		0.54	852.456	1.94805
Sample1689	Lung cancer	illumina_PANEL		0.24	1269.86	0.649351
Sample1690	Lung cancer	illumina_PANEL		0.39	1009.91	2.5974
Sample1691	Lung cancer	illumina_PANEL		0.52	1231.88	8.44156
Sample1692	Lung cancer	illumina_PANEL	0.59	1	950.643	3.24675
Sample1693	Lung cancer	illumina_PANEL	0.8	0.5	2400.55	7.22892
Sample1694	Lung cancer	illumina_PANEL		0.61	1327.75	1.94805
Sample1695	Esophagogastric Cancer	illumina_PANEL	0.91	1	712.489	42.8571
Sample1696	Lung cancer	illumina_PANEL	0.3	1	1045.14	1.94805
Sample1697	Esophagogastric Cancer	illumina_PANEL	0.16	0.21	995.067	3.24675
Sample1698	Lung cancer	illumina_PANEL	0.92	0.21	898.953	0.649351
Sample1699	Lung cancer	illumina_PANEL	0.8	0.77	1008.54	3.8961
Sample1700	Lung cancer	illumina_PANEL		0.37	531.442	2.5974
Sample1701	Renal Cell Carcinoma	illumina_PANEL		0.57	2163.34	3.61446
Sample1702	Lung cancer	illumina_PANEL	0.3	0.97	929.647	23.3766
Sample1703	Renal Cell Carcinoma	illumina_PANEL	0.64	0.22	2426.7	3.61446
Sample1704	Esophagogastric Cancer	illumina_WES	0.8	0.34	254.142	2.00395
Sample1705	Lung cancer	illumina_PANEL	0.8	0.38	1908.06	9.63855
Sample1706	Breast Cancer	illumina_PANEL	0.8	0.64	756.443	8.44156
Sample1707	Lung cancer	illumina_PANEL	0.36	0.37	1254.98	6.0241
Sample1708	Lung cancer	illumina_PANEL	0.19	0.3	1050.04	5.19481
Sample1709	Lung cancer	illumina_PANEL		0.39	875.84	5.19481
Sample1710	Lung cancer	illumina_PANEL	0.77	0.69	1106.32	23.3766
Sample1711	Lung cancer	illumina_PANEL		0.57	2555.81	2.40964
Sample1712	Lung cancer	illumina_PANEL		0.2	536.917	0.649351
Sample1713	Lung cancer	illumina_PANEL		0.21	817.157	1.94805
Sample1714	Lung cancer	illumina_PANEL	0.86	0.41	1176.25	2.5974
Sample1715	Lung cancer	illumina_PANEL		0.26	814.584	3.8961
Sample1716	Hepatobiliary Cancer	illumina_PANEL	0.62	0.65	1147.35	2.5974
Sample1717	Lung cancer	illumina_PANEL		1	826.754	32.4675
Sample1718	Lung cancer	illumina_PANEL		0.93	701.524	8.44156
Sample1719	Lung cancer	illumina_PANEL	0.84	0.23	916.935	3.24675
Sample1720	Hepatobiliary Cancer	illumina_PANEL	0.26	0.21	1584.72	0
Sample1721	Lung cancer	illumina_PANEL	0.26	1	1137.7	7.79221
Sample1722	Esophagogastric Cancer	illumina_PANEL	0.66	0.25	778.717	5.84416
Sample1723	Lung cancer	illumina_PANEL	0.22	0.36	1030.14	7.79221
Sample1724	Lung cancer	illumina_PANEL	0.45	0.65	1153.41	3.8961
Sample1725	Lung cancer	illumina_PANEL	0.4	0.79	1261.13	12.3377
Sample1726	Lung cancer	illumina_PANEL	0.46	0.81	1794.64	3.61446
Sample1727	Lung cancer	illumina_PANEL		0.22	1557.71	2.40964
Sample1728	Lung cancer	illumina_PANEL	0.55	0.38	845.372	4.54545
Sample1729	Lung cancer	illumina_PANEL	0.82	0.21	738.54	22.0779
Sample1730	Esophagogastric Cancer	illumina_PANEL	0.73	0.24	832.102	7.79221
Sample1731	Hepatobiliary Cancer	illumina_PANEL		0.3	789.061	5.19481
Sample1732	Lung cancer	illumina_PANEL		0.28	1016.48	1.94805
Sample1733	Lung cancer	illumina_PANEL	0.17	1	696.743	0
Sample1734	Lung cancer	illumina_PANEL		0.31	943.431	1.94805
Sample1735	Lung cancer	illumina_PANEL	0.83	0.3	651.277	0.649351
Sample1736	Lung cancer	illumina_PANEL	0.93	1	1036.46	1.94805
Sample1737	Lung cancer	illumina_PANEL	0.35	0.43	1156.56	5.19481
Sample1738	Lung cancer	illumina_PANEL		0.2	997.752	0.649351
Sample1739	Lung cancer	illumina_PANEL	0.68	0.38	1120.02	1.2987
Sample1740	Lung cancer	illumina_PANEL	0.2	1	948.069	22.7273
Sample1741	Lung cancer	illumina_PANEL	0.08	1	1009.55	1.2987
Sample1742	Lung cancer	illumina_PANEL	0.12	1	836.931	0.649351
Sample1743	Lung cancer	illumina_PANEL	0.91	0.31	1005.84	1.2987
Sample1744	Lung cancer	illumina_PANEL	0.52	0.3	955.847	2.5974
Sample1745	Lung cancer	illumina_PANEL	0.23	0.21	809.643	1.2987
Sample1746	Lung cancer	illumina_PANEL	0.75	1	495.94	11.039
Sample1747	Breast Cancer	illumina_PANEL		0.37	1131.38	4.54545
Sample1748	Lung cancer	illumina_PANEL		0.32	1757.12	9.63855
Sample1749	Lung cancer	illumina_PANEL	0.37	0.3	756.215	2.5974
Sample1750	Lung cancer	illumina_PANEL		0.48	779.182	10.3896
Sample1751	Lung cancer	illumina_PANEL	0.56	0.57	877.187	2.5974
Sample1752	Lung cancer	illumina_PANEL	0.72	0.82	839.221	4.54545
Sample1753	Esophagogastric Cancer	illumina_WES	0.22	0.45	251.12	4.0079
Sample1754	Lung cancer	illumina_PANEL		0.5	857.771	1.2987
Sample1755	Lung cancer	illumina_PANEL		0.58	920.069	4.54545
Sample1756	Lung cancer	illumina_PANEL		0.42	1125.06	0.649351
Sample1757	Lung cancer	illumina_PANEL		0.21	860.305	5.19481
Sample1758	Lung cancer	illumina_PANEL		0.64	843.055	1.94805
Sample1759	Lung cancer	illumina_PANEL		0.38	1105.63	1.94805
Sample1760	Lung cancer	illumina_PANEL		0.55	1046.88	4.54545
Sample1761	Esophagogastric Cancer	illumina_PANEL	0.07	0.2	1083.39	1.94805
Sample1762	Esophagogastric Cancer	illumina_PANEL	0.63	1	1176.78	2.5974
Sample1763	Lung cancer	illumina_PANEL	0.98	0.79	811.246	4.54545
Sample1764	Lung cancer	illumina_PANEL	0.04	0.21	772.437	4.54545
Sample1765	Esophagogastric Cancer	illumina_PANEL		0.7	1172.52	3.24675
Sample1766	Lung cancer	illumina_PANEL		0.22	964.461	1.2987
Sample1767	Lung cancer	illumina_PANEL	0.35	1	992.243	2.5974
Sample1768	Lung cancer	illumina_PANEL	0.7	1	1028.47	0.649351
Sample1769	Lung cancer	illumina_PANEL		1	986.596	3.24675
Sample1770	Lung cancer	illumina_PANEL	0.9	0.28	1036.57	1.2987
Sample1771	Lung cancer	illumina_PANEL	0.4	0.27	997.044	1.94805
Sample1772	Esophagogastric Cancer	illumina_PANEL		0.65	868.399	0
Sample1773	Lung cancer	illumina_PANEL	0.36	1	1200.15	0
Sample1774	Lung cancer	illumina_PANEL		0.27	911.843	6.49351
Sample1775	Lung cancer	illumina_PANEL		1	1161.8	2.5974
Sample1776	Lung cancer	illumina_PANEL		0.21	812.585	5.19481
Sample1777	Lung cancer	illumina_PANEL	0.58	0.28	618.989	0
Sample1778	Lung cancer	illumina_PANEL		1	1140.69	11.6883
Sample1779	Lung cancer	illumina_PANEL		0.29	1041.32	3.24675
Sample1780	Lung cancer	illumina_PANEL	0.68	1	2373.91	4.81928
Sample1781	Renal Cell Carcinoma	illumina_PANEL	0.5	0.29	1156.23	1.2987
Sample1782	Lung cancer	illumina_PANEL		1	1121.76	2.5974
Sample1783	Lung cancer	illumina_PANEL		0.43	828.825	11.6883
Sample1784	Esophagogastric Cancer	illumina_PANEL		0.24	856.574	5.84416
Sample1785	Esophagogastric Cancer	illumina_PANEL		1	533.331	4.54545
Sample1786	Esophagogastric Cancer	illumina_PANEL		0.65	864.758	5.84416
Sample1787	Esophagogastric Cancer	illumina_PANEL	0.89	0.45	733.685	14.2857
Sample1788	Esophagogastric Cancer	illumina_PANEL		0.31	605.294	6.49351
Sample1789	Esophagogastric Cancer	illumina_PANEL		0.63	791.322	3.24675
Sample1790	Esophagogastric Cancer	illumina_PANEL	0.95	0.55	427.517	3.8961
Sample1791	Esophagogastric Cancer	illumina_PANEL		0.72	576.338	9.74026
Sample1792	Esophagogastric Cancer	illumina_PANEL		0.38	548.192	5.84416
Sample1793	Esophagogastric Cancer	illumina_PANEL	0.3	0.29	558.781	4.54545
Sample1794	Esophagogastric Cancer	illumina_PANEL		0.7	428.692	3.8961
Sample1795	Esophagogastric Cancer	illumina_PANEL		0.21	585.322	7.14286
Sample1796	Esophagogastric Cancer	illumina_PANEL		0.2	566.499	7.79221
Sample1797	Hepatobiliary Cancer	illumina_PANEL		1	1203.69	2.40964
Sample1798	Lung cancer	illumina_PANEL		1	999.103	3.16456
Sample1799	Lung cancer	illumina_WES		0.71	457.767	1.49591
Sample1800	Lung cancer	illumina_WES		1	300.848	2.2862
Sample1801	Lung cancer	illumina_WES		0.28	236.952	6.1812
Sample1802	Lung cancer	illumina_WES		0.5	288.902	1.86283
Sample1803	Esophagogastric Cancer	illumina_WES		0.75	262.066	2.48377
Sample1804	Esophagogastric Cancer	illumina_WES		0.4	307.465	4.60062
Sample1805	Lung cancer	illumina_WES		0.68	267.33	16.7937
Sample1806	Esophagogastric Cancer	illumina_WES		0.31	357.141	0.564493
Sample1807	Glioma	illumina_WES		0.65	270.267	1.32656
Sample1808	Hepatobiliary Cancer	illumina_WES		0.44	318.24	0.903189
Sample1809	Lung cancer	illumina_WES		0.46	262.24	8.72142
Sample1810	Lung cancer	illumina_WES		0.6	234.284	8.4674
Sample1811	Melanoma	illumina_WES		0.45	267.924	0.084674
Sample1812	Melanoma	illumina_WES	0.77	0.31	327.782	0.790291
Sample1813	Renal Cell Carcinoma	illumina_WES		0.36	261.495	1.24189
Sample1814	Breast Cancer	illumina_WES		0.76	343.11	6.71747
Sample1815	Melanoma	illumina_WES		0.26	240.122	3.04826
Sample1816	Breast Cancer	illumina_WES		0.55	221.744	4.2337
Sample1817	Lung cancer	illumina_WES	0.08	0.25	242.797	1.55236
Sample1818	Hepatobiliary Cancer	illumina_WES	0.12	0.34	302.152	0.931414
Sample1819	Lung cancer	illumina_WES		0.3	261.608	1.69348
Sample1820	Esophagogastric Cancer	illumina_WES		0.53	325.723	5.41914
Sample1821	Glioma	illumina_WES		0.31	226.159	0
Sample1822	Hepatobiliary Cancer	illumina_WES		0.86	265.161	2.70957
Sample1823	Lung cancer	illumina_PANEL	0.52	0.31	991.454	1.2987
Sample1824	Lung cancer	illumina_PANEL	0.82	0.23	1145.92	2.5974
Sample1825	Lung cancer	illumina_PANEL	0.64	1	1315.09	9.09091
Sample1826	Lung cancer	illumina_PANEL	0.55	1	1507.21	5.19481
Sample1827	Lung cancer	MGI_PANEL	0.25	0.23	1704.19	3.62079
Sample1828	Lung cancer	illumina_PANEL	0.11	1	1049.7	13.6364
Sample1829	Lung cancer	illumina_PANEL		0.32	766.521	0
Sample1830	Lung cancer	illumina_PANEL		0.24	1896.59	0
Sample1831	Lung cancer	illumina_PANEL	0.24	1	704.959	2.5974
Sample1832	Breast Cancer	illumina_PANEL	0.9	0.4	1058.51	3.8961
Sample1833	Lung cancer	illumina_PANEL		0.44	1782.97	0.649351
Sample1834	Lung cancer	illumina_PANEL		0.2	913.982	7.79221
Sample1835	Lung cancer	illumina_PANEL	0.37	0.25	1045.61	0
Sample1836	Lung cancer	illumina_PANEL	0.32	1	1889.63	2.5974
Sample1837	Lung cancer	illumina_PANEL	0.8	0.53	493.474	10.3896
Sample1838	Lung cancer	illumina_PANEL	0.91	1	2235.24	2.40964
Sample1839	Lung cancer	illumina_PANEL		0.22	899.498	2.5974
Sample1840	Lung cancer	illumina_PANEL	0.76	0.22	840.343	3.24675
Sample1841	Esophagogastric Cancer	illumina_PANEL	0.09	1	915.87	0
Sample1842	Lung cancer	illumina_PANEL	0.26	1	548.678	0.649351
Sample1843	Lung cancer	illumina_PANEL	0.26	0.31	1125.15	0
Sample1844	Pancreatic Cancer	illumina_PANEL		0.51	361.54	19.4805
Sample1845	Pancreatic Cancer	illumina_PANEL		0.44	980.859	5.84416
Sample1846	Lung cancer	illumina_PANEL	0.87	0.44	1116.52	5.84416
Sample1847	Lung cancer	illumina_PANEL	0.11	1	896.415	12.987
Sample1848	Pancreatic Cancer	illumina_PANEL	0.38	0.48	2239.84	8.44156
Sample1849	Lung cancer	illumina_PANEL		0.29	1033.17	11.039
Sample1850	Lung cancer	illumina_PANEL	0.72	0.41	968.02	18.8312
Sample1851	Esophagogastric Cancer	illumina_PANEL		1	994.619	3.8961
Sample1852	Lung cancer	illumina_PANEL	0.78	0.48	1073.9	6.49351
Sample1853	Lung cancer	illumina_PANEL	0.35	0.5	743.562	13.6364
Sample1854	Esophagogastric Cancer	illumina_PANEL	0.29	0.3	648.271	3.24675
Sample1855	Lung cancer	illumina_PANEL	0.36	1	1596.62	9.63855
Sample1856	Lung cancer	illumina_PANEL	0.44	0.26	903.449	2.5974
Sample1857	Lung cancer	illumina_PANEL		0.53	1140.48	11.6883
Sample1858	Lung cancer	illumina_PANEL		0.4	1078.86	16.2338
Sample1859	Lung cancer	illumina_PANEL	0.65	0.33	464.942	1.94805
Sample1860	Lung cancer	illumina_PANEL	0.87	0.35	1014.37	5.19481
Sample1861	Lung cancer	illumina_PANEL	0.08	1	1096.01	1.2987
Sample1862	Lung cancer	illumina_PANEL		0.24	905.373	3.24675
Sample1863	Lung cancer	illumina_PANEL	0.49	1	880.805	1.2987
Sample1864	Lung cancer	illumina_PANEL	0.37	1	861.857	2.5974
Sample1865	Lung cancer	illumina_PANEL		0.22	1017.19	3.24675
Sample1866	Renal Cell Carcinoma	illumina_PANEL		0.29	857.214	0.649351
Sample1867	Lung cancer	illumina_PANEL	0.94	0.64	739.925	7.14286
Sample1868	Lung cancer	illumina_PANEL		0.2	692.413	2.5974
Sample1869	Lung cancer	MGI_PANEL	0.89	0.28	1281.51	4.44377
Sample1870	Lung cancer	illumina_PANEL	0.69	0.35	1207.03	5.19481
Sample1871	Lung cancer	illumina_PANEL		0.36	981.15	3.24675
Sample1872	Lung cancer	illumina_PANEL		0.49	2391.49	7.79221
Sample1873	Esophagogastric Cancer	illumina_PANEL	0.7	0.41	1134.03	2.5974
Sample1874	Lung cancer	illumina_PANEL	0.49	0.23	1020.4	13.6364
Sample1875	Lung cancer	illumina_PANEL	0.66	0.32	964.375	2.5974
Sample1876	Lung cancer	illumina_PANEL		1	1017.33	3.8961
Sample1877	Lung cancer	illumina_PANEL	0.2	0.31	1199.95	6.49351
Sample1878	Pancreatic Cancer	illumina_PANEL		0.23	704.694	1.94805
Sample1879	Pancreatic Cancer	MGI_PANEL	0.4	0.5	1887.88	6.03465
Sample1880	Lung cancer	illumina_PANEL	0.94	0.23	1020.43	5.84416
Sample1881	Lung cancer	illumina_PANEL	0.32	0.55	1109.9	9.74026
Sample1882	Lung cancer	illumina_PANEL	0.26	1	2485.68	0
Sample1883	Lung cancer	illumina_PANEL	0.88	1	2563.26	7.79221
Sample1884	Lung cancer	illumina_PANEL	0.45	0.48	887.157	11.039
Sample1885	Lung cancer	illumina_PANEL	0.89	0.93	1037.68	7.79221
Sample1886	Lung cancer	illumina_PANEL	0.91	0.42	743.087	0.649351
Sample1887	Renal Cell Carcinoma	illumina_PANEL	0.95	0.65	1759.89	6.49351
Sample1888	Lung cancer	illumina_PANEL	0.05	1	618.077	0
Sample1889	Melanoma	illumina_PANEL		0.2	1106.28	0
Sample1890	Hepatobiliary Cancer	illumina_PANEL		0.22	1061.21	16.8831
Sample1891	Renal Cell Carcinoma	illumina_PANEL	0.08	0.2	925.202	2.5974
Sample1892	Lung cancer	illumina_PANEL	0.88	0.66	897.884	7.79221
Sample1893	Esophagogastric Cancer	illumina_PANEL	0.4	0.2	1878.55	3.8961
Sample1894	Lung cancer	illumina_PANEL		0.77	1143.64	8.44156
Sample1895	Lung cancer	illumina_PANEL		0.23	877.429	13.6364
Sample1896	Melanoma	illumina_PANEL	0.72	0.79	1118.62	1.94805
Sample1897	Hepatobiliary Cancer	illumina_PANEL	0.32	0.27	1090.69	3.24675
Sample1898	Hepatobiliary Cancer	illumina_PANEL		0.53	1072.13	1.94805
Sample1899	Breast Cancer	illumina_PANEL	0.46	0.47	1007.78	3.8961
Sample1900	Renal Cell Carcinoma	illumina_PANEL	0.76	0.66	1033.85	5.19481
Sample1901	Lung cancer	illumina_PANEL	0.56	0.32	1347.27	13.6364
Sample1902	Lung cancer	illumina_PANEL		1	952.216	3.8961
Sample1903	Lung cancer	illumina_PANEL		0.71	962.032	1.2987
Sample1904	Lung cancer	illumina_PANEL		0.27	879.48	4.54545
Sample1905	Lung cancer	illumina_PANEL		1	1085.1	0.649351
Sample1906	Lung cancer	illumina_PANEL	0.54	1	1108.09	1.94805
Sample1907	Esophagogastric Cancer	illumina_PANEL		1	968.797	3.24675
Sample1908	Lung cancer	illumina_PANEL	0.05	1	760.918	5.19481
Sample1909	Lung cancer	illumina_PANEL		0.27	733.274	0.649351
Sample1910	Lung cancer	illumina_PANEL	0.57	0.4	856.964	3.24675
Sample1911	Lung cancer	illumina_PANEL	0.75	0.27	1152.69	9.09091
Sample1912	Lung cancer	illumina_PANEL	0.74	0.24	831.977	2.5974
Sample1913	Lung cancer	illumina_PANEL		0.36	766.466	0
Sample1914	Esophagogastric Cancer	illumina_PANEL	0.55	1	1172.93	1.94805
Sample1915	Lung cancer	illumina_PANEL		0.29	923.705	14.2857
Sample1916	Esophagogastric Cancer	illumina_PANEL	0.46	0.23	868.223	5.19481
Sample1917	Lung cancer	illumina_PANEL	0.82	0.27	1128.11	4.54545
Sample1918	Esophagogastric Cancer	illumina_PANEL	0.92	1	433.054	5.84416
Sample1919	Lung cancer	illumina_PANEL		0.49	822.34	7.14286
Sample1920	Lung cancer	illumina_PANEL		0.43	967.199	10.3896
Sample1921	Lung cancer	illumina_PANEL	0.88	0.31	1657.08	0
Sample1922	Lung cancer	MGI_PANEL	0.4	0.4	1613.58	1.90447
Sample1923	Hepatobiliary Cancer	illumina_PANEL		0.7	1222.43	4.54545
Sample1924	Lung cancer	illumina_PANEL		1	942.826	11.039
Sample1925	Lung cancer	illumina_PANEL	0.53	0.21	988.189	7.14286
Sample1926	Lung cancer	illumina_PANEL	0.23	0.28	631.29	1.94805
Sample1927	Esophagogastric Cancer	illumina_PANEL		0.31	1141.64	10.3896
Sample1928	Lung cancer	illumina_PANEL		0.24	890.335	1.2987
Sample1929	Lung cancer	illumina_PANEL	0.43	0.29	842.202	3.8961
Sample1930	Hepatobiliary Cancer	illumina_WES		0.34	167.229	1.24189
Sample1931	Lung cancer	illumina_PANEL		0.4	1951.61	4.81928
Sample1932	Lung cancer	illumina_PANEL		0.26	1143.34	6.49351
Sample1933	Melanoma	illumina_PANEL	0.6	0.55	1014.08	3.8961
Sample1934	Lung cancer	illumina_PANEL	0.3	0.28	1228.48	12.987
Sample1935	Lung cancer	illumina_PANEL	0.8	0.23	1146.91	1.2987
Sample1936	Renal Cell Carcinoma	illumina_PANEL	0.38	0.23	934.302	30.5195
Sample1937	Lung cancer	illumina_PANEL		1	1092.95	7.79221
Sample1938	Lung cancer	illumina_PANEL		0.37	1278.49	1.94805
Sample1939	Esophagogastric Cancer	illumina_PANEL	0.22	1	855.62	3.8961
Sample1940	Esophagogastric Cancer	illumina_PANEL		0.48	1206.74	3.24675
Sample1941	Lung cancer	illumina_PANEL	0.15	0.54	802.688	11.039
Sample1942	Lung cancer	illumina_PANEL	0.67	0.33	1019.6	2.5974
Sample1943	Melanoma	illumina_PANEL	0.18	0.37	1304.61	2.5974
Sample1944	Lung cancer	MGI_PANEL	0.19	0.21	1601.33	5.71342
Sample1945	Lung cancer	MGI_PANEL	0.71	1	1385.55	12.6965
Sample1946	Lung cancer	MGI_PANEL	0.4	1	1045.59	3.17412
Sample1947	Lung cancer	MGI_PANEL	0.11	0.53	1566.95	23.4885
Sample1948	Lung cancer	MGI_PANEL	0.43	0.57	1984.28	19.0447
Sample1949	Lung cancer	MGI_PANEL	0.57	0.26	1251.94	3.17412
Sample1950	Lung cancer	illumina_PANEL	0.3	0.75	529.356	4.54545
Sample1951	Lung cancer	illumina_PANEL		0.42	644.432	14.9351
Sample1952	Lung cancer	illumina_PANEL	0.97	0.53	1571.15	1.94805
Sample1953	Lung cancer	illumina_PANEL	0.73	0.83	1005.53	9.74026
Sample1954	Lung cancer	illumina_PANEL	0.84	0.51	896.495	12.987
Sample1955	Lung cancer	illumina_PANEL	0.07	1	978.999	0
Sample1956	Hepatobiliary Cancer	illumina_PANEL		0.4	1078.12	3.8961
Sample1957	Lung cancer	illumina_PANEL	0.81	1	1306.53	5.84416
Sample1958	Hepatobiliary Cancer	illumina_PANEL	0.37	0.43	1019.07	2.5974
Sample1959	Hepatobiliary Cancer	illumina_PANEL		1	604.235	2.5974
Sample1960	Lung cancer	illumina_PANEL		0.6	1051.42	3.24675
Sample1961	Lung cancer	illumina_PANEL	0.55	0.44	786.287	16.8831
Sample1962	Hepatobiliary Cancer	illumina_PANEL		0.46	1176.78	7.14286
Sample1963	Lung cancer	illumina_PANEL	0.73	0.37	1130.6	4.54545
Sample1964	Hepatobiliary Cancer	illumina_PANEL		0.52	809.074	9.74026
Sample1965	Renal Cell Carcinoma	MGI_PANEL	0.68	0.29	1307.45	8.25271
Sample1966	Lung cancer	MGI_PANEL	0.02	0.43	2378.87	0
Sample1967	Lung cancer	illumina_PANEL		1	586.025	5.84416
Sample1968	Lung cancer	illumina_PANEL	0.1	0.27	701.269	0
Sample1969	Lung cancer	illumina_PANEL		0.4	1443.21	3.8961
Sample1970	Melanoma	illumina_PANEL		0.36	1085.28	1.94805
Sample1971	Melanoma	illumina_PANEL	0.6	0.6	2024.67	0
Sample1972	Lung cancer	illumina_PANEL	0.46	0.81	1787.68	8.44156
Sample1973	Lung cancer	illumina_PANEL	0.47	0.3	1123.34	6.49351
Sample1974	Hepatobiliary Cancer	illumina_PANEL	0.24	0.36	1745.08	3.8961
Sample1975	Lung cancer	illumina_PANEL	0.64	1	1266.02	1.94805
Sample1976	Esophagogastric Cancer	illumina_PANEL	0.56	0.5	1050.34	3.8961
Sample1977	Esophagogastric Cancer	illumina_PANEL		0.35	957.14	0
Sample1978	Hepatobiliary Cancer	illumina_PANEL	0.56	1	747.809	3.24675
Sample1979	Lung cancer	illumina_PANEL	0.93	1	1343.45	3.8961
Sample1980	Lung cancer	illumina_PANEL	0.27	1	937.719	18.8312
Sample1981	Lung cancer	illumina_PANEL	0.91	0.43	828.653	4.54545
Sample1982	Lung cancer	illumina_PANEL		0.5	814.447	5.84416
Sample1983	Lung cancer	illumina_PANEL		0.31	1529.19	3.8961
Sample1984	Lung cancer	illumina_PANEL		0.36	998.895	5.84416
Sample1985	Esophagogastric Cancer	illumina_PANEL	0.11	1	861.327	3.8961
Sample1986	Lung cancer	illumina_PANEL		0.68	1164.2	3.24675
Sample1987	Lung cancer	illumina_PANEL	0.48	1	2924.16	3.61446
Sample1988	Lung cancer	illumina_PANEL		0.43	1298.92	1.94805
Sample1989	Hepatobiliary Cancer	illumina_PANEL		1	1041.78	1.94805
Sample1990	Hepatobiliary Cancer	illumina_PANEL	0.14	0.42	767.32	3.8961
Sample1991	Melanoma	illumina_PANEL		0.35	1130.28	0.649351
Sample1992	Melanoma	illumina_PANEL	0.41	0.63	2598.37	1.20482
Sample1993	Esophagogastric Cancer	illumina_PANEL		1	759.077	9.09091
Sample1994	Lung cancer	illumina_PANEL		0.25	970.91	2.5974
Sample1995	Melanoma	illumina_PANEL	0.9	0.26	1497.32	4.54545
Sample1996	Hepatobiliary Cancer	MGI_PANEL	0.96	0.9	1245.22	1.26965
Sample1997	Esophagogastric Cancer	MGI_PANEL	0.85	0.28	1321.64	1.26965
Sample1998	Hepatobiliary Cancer	MGI_PANEL	0.73	0.75	1126.84	0.634824
[truncated: 2,128 more rows]
